# Supplementary material
Source: PubMed Central journal article supplement (PMC6217432)
Supplement: pnas.1800502115.sapp.pdf [file pnas.1800502115.sapp.pdf]

## Supporting Information

### **Extracellularly oxidative activation and inactivation of matured prodrug for cryptic self-resistance in naphthyridinomycin biosynthesis**

Yue Zhang<sup>a,1</sup>, Wan-Hong Wen<sup>a,1</sup>, Jin-Yue Pu<sup>a</sup>, Man-Cheng Tang<sup>a</sup>, Liwen Zhang<sup>b</sup>, Chao Peng<sup>c</sup>, Yuquan Xu<sup>b</sup> and Gong-Li Tang<sup>a,2</sup>

<sup>a</sup>State Key Laboratory of Bio-organic and Natural Products Chemistry, Center for Excellence in Molecular Synthesis, Shanghai Institute of Organic Chemistry, University of Chinese Academy of Sciences, Chinese Academy of Sciences, 345 Lingling Road, Shanghai 200032, China

<sup>b</sup>Biotechnology Research Institute, Chinese Academy of Agricultural Sciences, 12 Zhongguancun South Street, Beijing 100081, China

<sup>c</sup>National Facility for Protein Science in Shanghai, Zhangjiang Lab, Shanghai, 201210, China.

<sup>1</sup>These authors contributed equally to this work.

<sup>2</sup>Correspondence: Gong-Li Tang, Email: [gltang@sioc.ac.cn](mailto:gltang@sioc.ac.cn).

## Supplementary Tables

**Table S1.** Strains and plasmids used in this study

| Strain/Plasmid                               | Characteristics*                                                                                                        | Reference                  |
|----------------------------------------------|-------------------------------------------------------------------------------------------------------------------------|----------------------------|
| <b>Strains</b>                               |                                                                                                                         |                            |
| <i>E. coli</i> DH5 $\alpha$                  | Host for general cloning                                                                                                | Invitrogen                 |
| <i>E. coli</i> Rosetta <sup>TM</sup> 2 (DE3) | Host for gene expression                                                                                                | Novagen                    |
| <i>E. coli</i> BL21 (DE3)                    | Host for gene expression                                                                                                | Invitrogen                 |
| <i>S. lividans</i> 1326                      | Host for protein expression                                                                                             | 1                          |
| <i>S. lusitanus</i> NRRL 8034                | Wild type, NDM producing strain                                                                                         | NRRL                       |
| <i>S. lusitanus</i> TG3020                   | $\Delta napU$ gene replacement mutant                                                                                   | This work                  |
| <i>S. lusitanus</i> TG3021                   | $\Delta napU$ gene complementation mutant with pTG3030                                                                  | This work                  |
| <i>S. lividans</i> TG3026                    | NapU protein expression with pTG3034                                                                                    | This work                  |
| <b>Plasmids</b>                              |                                                                                                                         |                            |
| pMD19-T                                      | $Ap^R$ , <i>E. coli</i> subcloning vector                                                                               | Takara                     |
| pLY10                                        | $Am^R$ , Heterologous expression vector in <i>Streptomyces</i> , pHZ1358 derivative with <i>Perme</i> * inserted        | Gift from Dr. Wenqing Chen |
| pKC1139                                      | $Am^R$ , <i>E. coli-Streptomyces</i> shuttle vector for gene inactivation                                               | 1                          |
| pSET152                                      | $Am^R$ , <i>E. coli-Streptomyces</i> shuttle vector for gene complementation                                            | 1                          |
| pET37b                                       | Protein expression in <i>E. coli</i>                                                                                    |                            |
| pET28a                                       | Protein expression in <i>E. coli</i>                                                                                    |                            |
| pTG3030                                      | pSET152 derivative for gene complementation of <i>napU</i>                                                              | This work                  |
| pTG3031                                      | pTG3001 derivative for gene replacement of <i>napU</i>                                                                  | This work                  |
| pTG3033                                      | pET37b derivative containing <i>napU</i> gene for protein expression in <i>E. coli</i>                                  | This work                  |
| pTG3034                                      | pLY10 derivative containing <i>napU</i> gene for protein expression in <i>S. lividans</i>                               | This work                  |
| pTG3035                                      | pET37b derivative containing truncated <i>napU</i> gene for expression of signal peptide-removed NapU in <i>E. coli</i> | This work                  |
| pTG3036                                      | pET37b derivative containing mutated <i>napU</i> (C170A) gene for protein expression                                    | This work                  |
| pTG3037                                      | pET37b derivative containing mutated <i>napU</i> (H110A) gene for protein                                               | This work                  |

---

|         |                                                                                                                |           |
|---------|----------------------------------------------------------------------------------------------------------------|-----------|
| pTG3038 | expression<br>pET37b derivative containing mutated<br><i>napU</i> (C170A/H110A) gene for protein<br>expression | This work |
| pTG3039 | pET37b derivative containing mutated<br><i>napU</i> (Y184F) gene for protein<br>expression                     | This work |
| pTG3040 | pET37b derivative containing mutated<br><i>napU</i> (Y187F) gene for protein<br>expression                     | This work |
| pTG3041 | pET37b derivative containing mutated<br><i>napU</i> (Y441F) gene for protein<br>expression                     | This work |
| pTG3042 | pET37b derivative containing mutated<br><i>napU</i> (Y486F) gene for protein<br>expression                     | This work |
| pTG3043 | pET37b derivative containing mutated<br><i>napU</i> (Y489F) gene for protein<br>expression                     | This work |

---

Abbreviations:  $Ap^R$ , ampicillin resistance;  $Km^R$ , kanamycin resistance;  $Am^R$ , apramycin resistance.  $Sp^R$ , spectinomycin resistance.

1. Kieser, T.; Bibb, M.; Butter, M.; Chater, K. F.; Hopwood, D. A. *Practical Streptomyces Genetics*; The John Innes Foundation, Norwich., 2001.

**Table S2.** PCR primers used in this study

| Primers        | Sequence                                                           | Enzyme         | Application               |
|----------------|--------------------------------------------------------------------|----------------|---------------------------|
| napU-Red-for   | CAGGAGGTCGCCGTCGGTCCGGCGGTCA<br>CTGCCTCGAGATTCCGGGGATCCGTCGAC<br>C |                | Gene<br>replacement       |
| napU-Red-rev   | GACGCGCAGGATCGAGTCCCGGTGGACG<br>TAGGCGGTCGCTGTAGGCTGGAGCTGCTT<br>C |                |                           |
| napU-p-for     | CATATGTCTGAACTGAACCGCCG                                            | <i>NdeI</i>    | Protein<br>expression     |
| napU-p-rev     | AAGCTTGGCGGGCCGGATCGACAGC                                          | <i>HindIII</i> |                           |
| napU-cut-for   | CATATGGCCGGGAAGAACACCGCGAAG                                        | <i>NdeI</i>    |                           |
| napU-C-for     | AAGCTTTCGCTTGTGAAAGGAGACC                                          | <i>HindIII</i> | Complement-<br>ation      |
| napU-C-rev     | TCTAGAGCTTTCTGTGACGCTTGGAC                                         | <i>XbaI</i>    |                           |
| napU-H110A-for | GTCGCCGTCCGTTCCGGCGGTGCCTGCCT<br>CGAGAAC                           |                | Site-directed<br>mutation |
| napU-H110A-rev | GGCACCGCCGGAACGGACGGCGACCTCC<br>TGGC                               |                |                           |
| napU-C170A-for | GTGACGATACCCTCGGCGGGCGCCTCGG<br>AAGTGGGC                           |                | Site-directed<br>mutation |
| napU-C170A-rev | GGCGCCCGCCGAGGGTATCGTCACGCCCC<br>AGCC                              |                |                           |
| napU-Y184F-for | GCGGGCACATACTCGGCGGGCGGCTTCAA<br>CTTCTACTCC                        |                | Site-directed<br>mutation |
| napU-Y184F-rev | GAAGCCGCCGCCGAGTATGTGCCCGCCG<br>AGGC                               |                |                           |
| napU-Y187F-for | CTCGGCGGGCGGCTACAACCTTCTTCCCG<br>CATCCACGG                         |                | Site-directed<br>mutation |
| napU-Y187F-rev | GAAGAAGTTGTAGCCGCCGCCGAGTATG<br>TGCC                               |                |                           |
| napU-Y442F-for | GGGACTCGATCCTGCGCGTCTTCTTACG<br>CCCGGCGTG                          |                | Site-directed<br>mutation |
| napU-Y442F-rev | GAAGACGCGCAGGATCGAGTCCCGGTGG<br>ACGTAG                             |                |                           |
| napU-Y486F-for | GACGCCGCCAACTCGGGGGCGTTCATCA<br>ACTACCCGG                          |                | Site-directed<br>mutation |
| napU-Y486F-rev | GAACGCCCCCGAGTTGGCGGCGTCGGGC<br>GCC                                |                |                           |
| napU-Y489F-for | AACTCGGGGGCGTACATCAACTTCCCGGA<br>CGTCGACC                          |                | Site-directed<br>mutation |
| napU-Y489F-rev | GAAGTTGATGTACCCCCGAGTTGGCGG<br>CGTC                                |                |                           |

**Table S3.**  $^1\text{H}$  (500 MHz) and  $^{13}\text{C}$  (125 MHz) data of compound **5**, **6**, **7**<sup>a</sup>

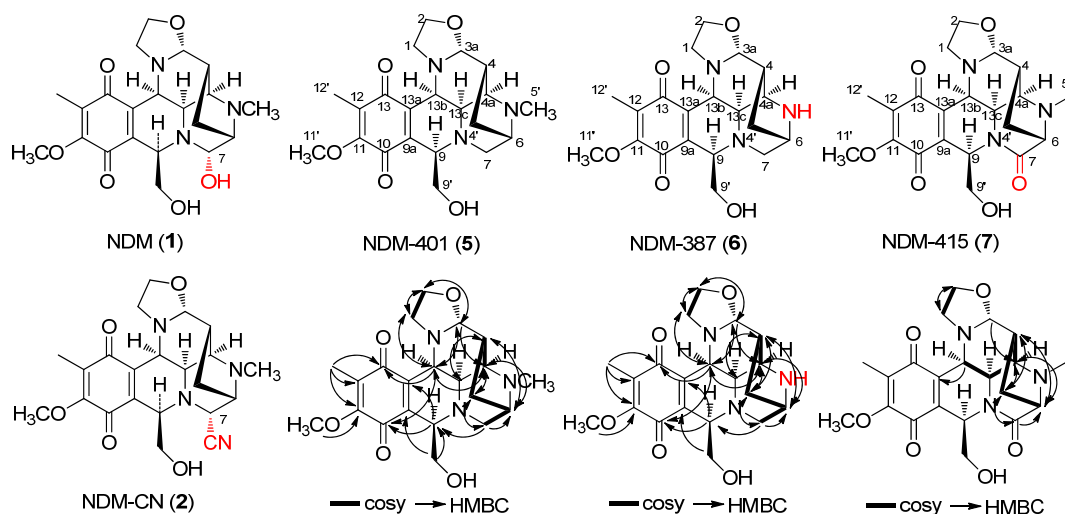

| Compound | NDM-401 ( <b>5</b> )  |                             | NDM-387 ( <b>6</b> )  |                              | NDM-415 ( <b>7</b> )  |                               |
|----------|-----------------------|-----------------------------|-----------------------|------------------------------|-----------------------|-------------------------------|
|          | $\delta_{\text{C}}$   | $\delta_{\text{H}}$         | $\delta_{\text{C}}$   | $\delta_{\text{H}}$          | $\delta_{\text{C}}$   | $\delta_{\text{H}}$           |
| 1        | 50.50,CH <sub>2</sub> | 3.05(ddd,1H),<br>2.97(m,1H) | 50.14,CH <sub>2</sub> | 3.05(ddd,1H),<br>2.96 (m,1H) | 51.42,CH <sub>2</sub> | 3.01(m,2H),                   |
| 2        | 61.32,CH <sub>2</sub> | 3.69(m,1H),<br>3.98(dd,1H)  | 61.34,CH <sub>2</sub> | 3.69 (m,1H),<br>3.99 (m,1H)  | 63.30,CH <sub>2</sub> | 3.79 (td,1H),<br>4.09 (dt,1H) |
| 3a       | 93.99,CH              | 4.72(s,1H)                  | 93. 67,CH             | 4.68(s,1H)                   | 94. 64,CH             | 4.68(s,1H)                    |
| 4        | 35.97,CH              | 2.87(m,1H)                  | 35.65,CH              | 2.60(m,1H)                   | 35.65,CH              | 2.98(m,1H)                    |
| 4'       | 30.04,CH <sub>2</sub> | 1.73(dd,1H),<br>2.32(td,1H) | 32.09,CH <sub>2</sub> | 1.73(dd,1H),<br>2.16(td,1H)  | 35.28,CH <sub>2</sub> | 1.79(dd,1H),<br>2.65(td,1H)   |
| 4a       | 60.37,CH              | 3.12(br,1H)                 | 53.68,CH              | 3.38(br,1H)                  | 59.41,CH              | 3.48(m,1H)                    |
| 5'       | 39.86,CH <sub>3</sub> | 2.39(s,3H)                  | -----                 | -----                        | 36.79,CH <sub>3</sub> | 2.53(s,3H)                    |
| 6        | 60.52,CH              | 3.22(br,1H)                 | 53.81,CH              | 3.59(br,1H)                  | 66.75,CH              | 3.38(d,1H)                    |
| 7        | 52.23,CH <sub>2</sub> | 2.76(d,1H),<br>2.90(m,1H)   | 54.15,CH <sub>2</sub> | 2.58(m,1H),<br>2.99(m,1H)    | 174.99,C              | -----                         |
| 9        | 59.02,CH              | 3.92(br,1H)                 | 58.81,CH              | 3.91(br,1H)                  | 53.99,CH              | 5.23(t,1H)                    |
| 9'       | 60.87,CH <sub>2</sub> | 3.52(d,1H),<br>3.95(dd,1H)  | 60.72,CH <sub>2</sub> | 3.53(d,1H),<br>3.93(dd,1H)   | 61.69,CH <sub>2</sub> | 3.52(dd,1H),<br>4.53(dd,1H)   |
| 9a       | 142.61,C              | -----                       | 142.18,C              | -----                        | 142.09,C              | -----                         |
| 10       | 182.06,C              | -----                       | 181.82,C              | -----                        | 182.32,C              | -----                         |
| 11       | 156.02,C              | -----                       | 155.75,C              | -----                        | 157.49,C              | -----                         |
| 11'      | 61.21,CH <sub>3</sub> | 4.01(s,3H)                  | 69.97,CH <sub>3</sub> | 4.01(s,3H)                   | 61.69,CH <sub>3</sub> | 4.07(s,3H)                    |
| 12       | 128.48,C              | -----                       | 128.28,C              | -----                        | 129.62,C              | -----                         |
| 12'      | 9.07,CH <sub>3</sub>  | 1.95(s,3H)                  | 8.84,CH <sub>3</sub>  | 1.96(s,3H)                   | 9.03,CH <sub>3</sub>  | 1.98(s,3H)                    |
| 13       | 187.00,C              | -----                       | 186.77,C              | -----                        | 187.52,C              | -----                         |
| 13a      | 143.85,C              | -----                       | 143.66,C              | -----                        | 143.12,C              | -----                         |
| 13b      | 48.53,CH              | 3.67(s,1H)                  | 48.14,CH              | 3.71(s,1H)                   | 47.73,CH              | 3.94(s,1H)                    |
| 13c      | 54.27,CH              | 2.68(s,1H)                  | 55.41,CH              | 2.56(s,1H)                   | 54.32,CH              | 3.67(d,1H)                    |

<sup>a</sup>The NMR analysis of **5** and **6** is performed in CDCl<sub>3</sub>; and **7** in CD<sub>3</sub>OD.

## Supplementary Figures

**Figure S1.** Identification of the genotype of *napU*-gene replacement mutant.

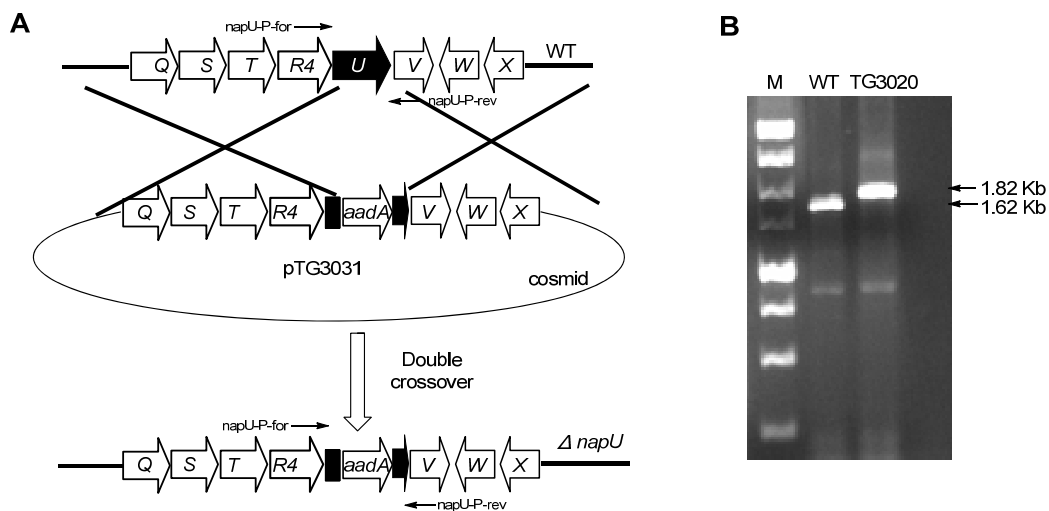

The genome DNA was extracted from wild type and mutant strains for PCR amplification as template using *napU*-P-for/rev as primers respectively (Table S2). (A) Replacement of *napU* gene by spectinomycin resistance gene (*aadA*) to generate double crossover mutant *S. lusitanus* TG3020 ( $\Delta napU$ ). (B) A signal of 1.62 Kb can be detected with the genome DNA of wild type strain, while gene replacement mutant strain gives 1.82 Kb.

**Figure S2.** NMR spectra of compound **5**. (A)  $^1\text{H}$  spectrum (B)  $^{13}\text{C}$  spectrum (C) COSY spectrum (D) HMQC spectrum (E) HMBC spectrum.

**A**

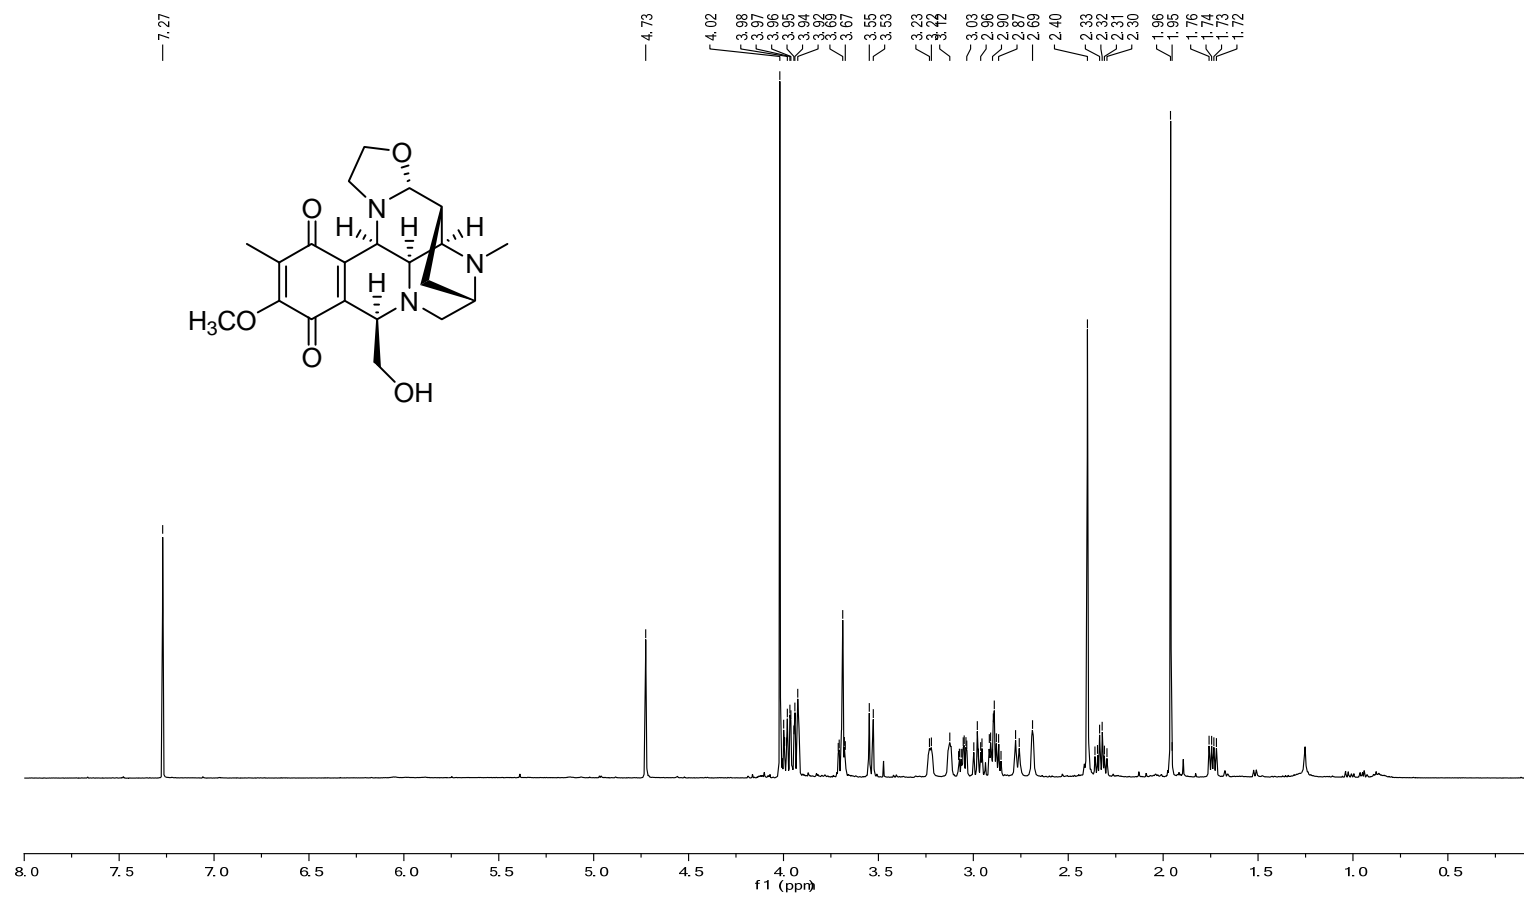

**B**

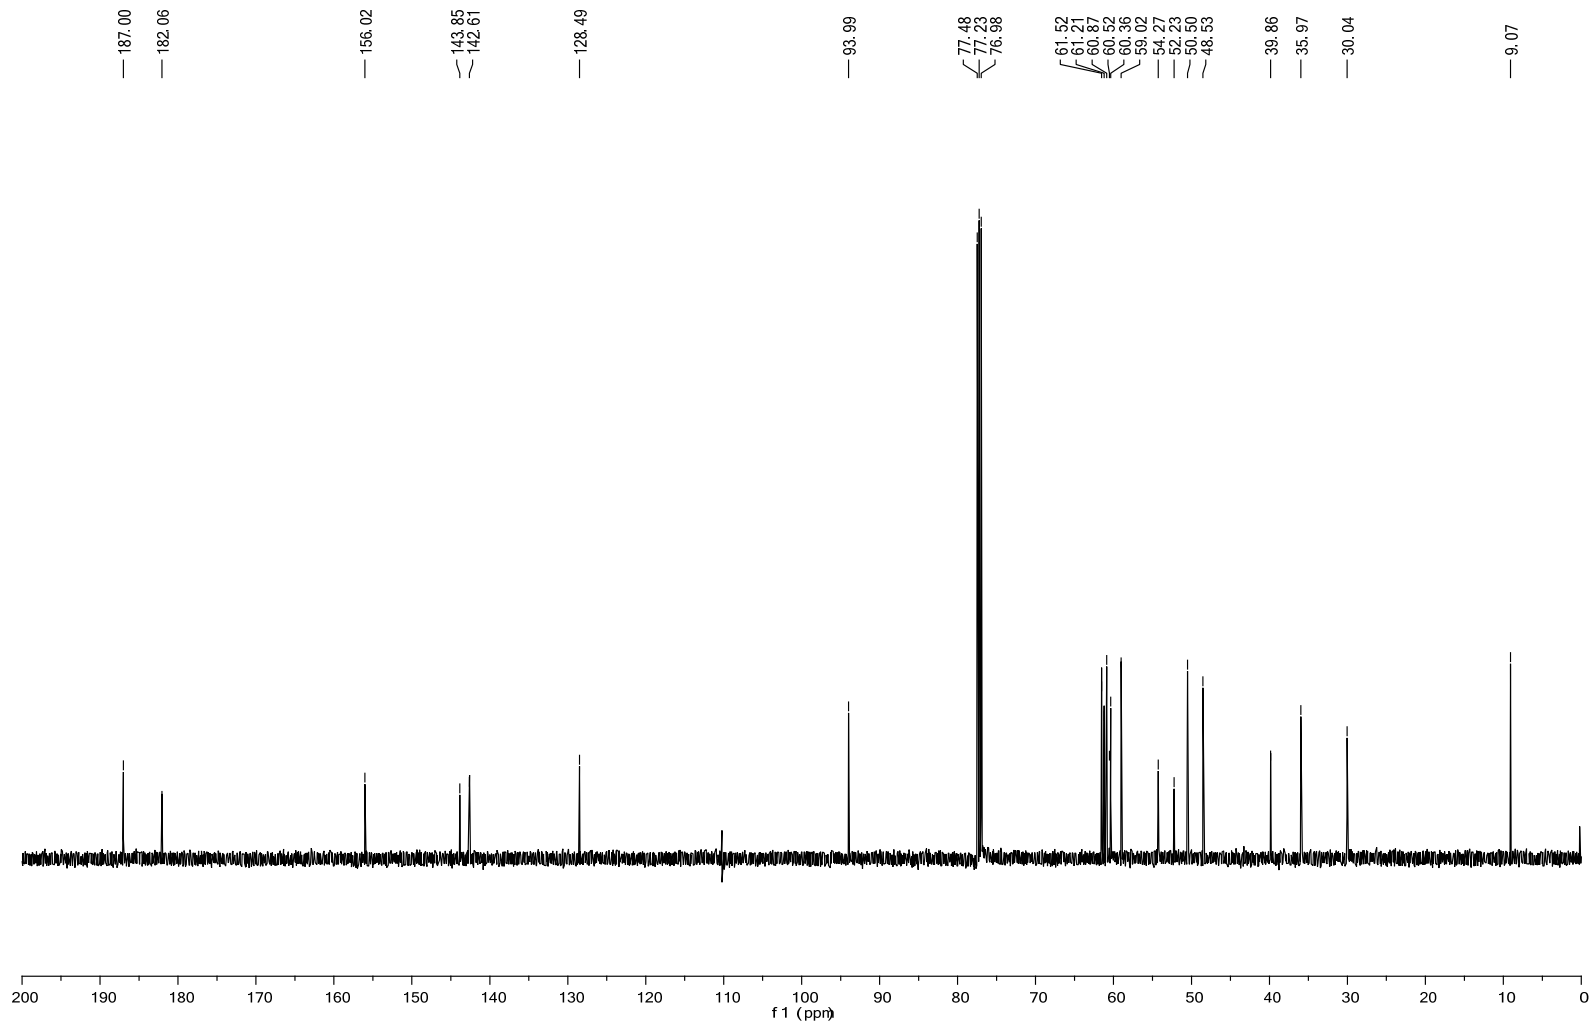



C

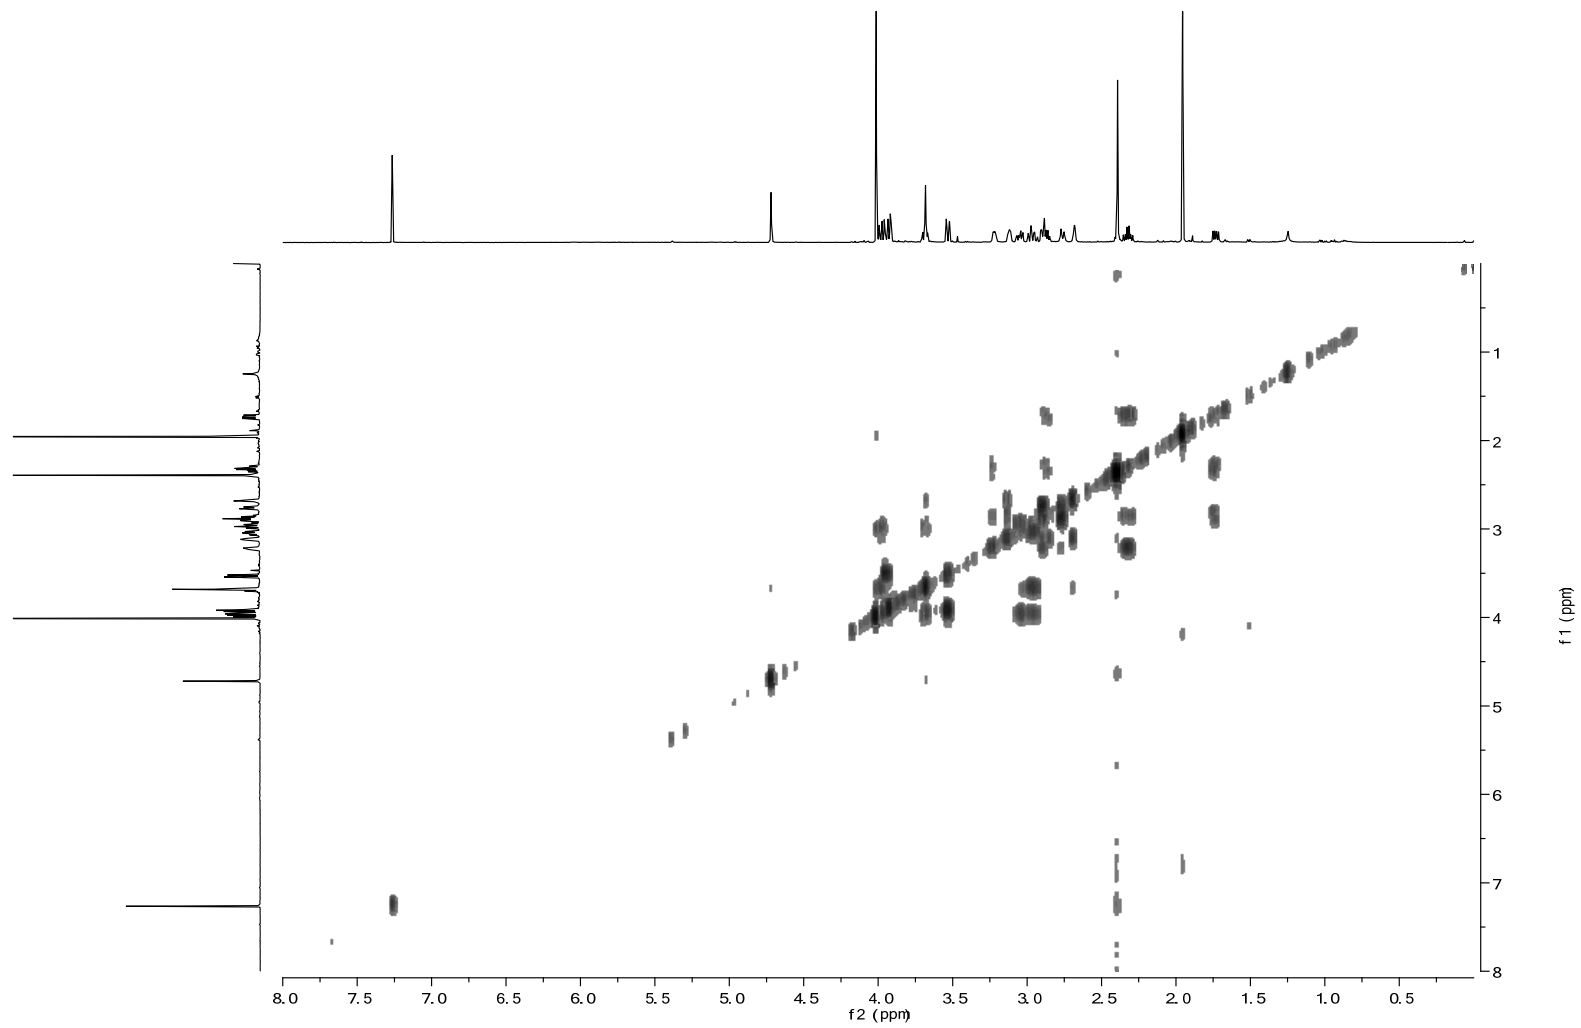

D

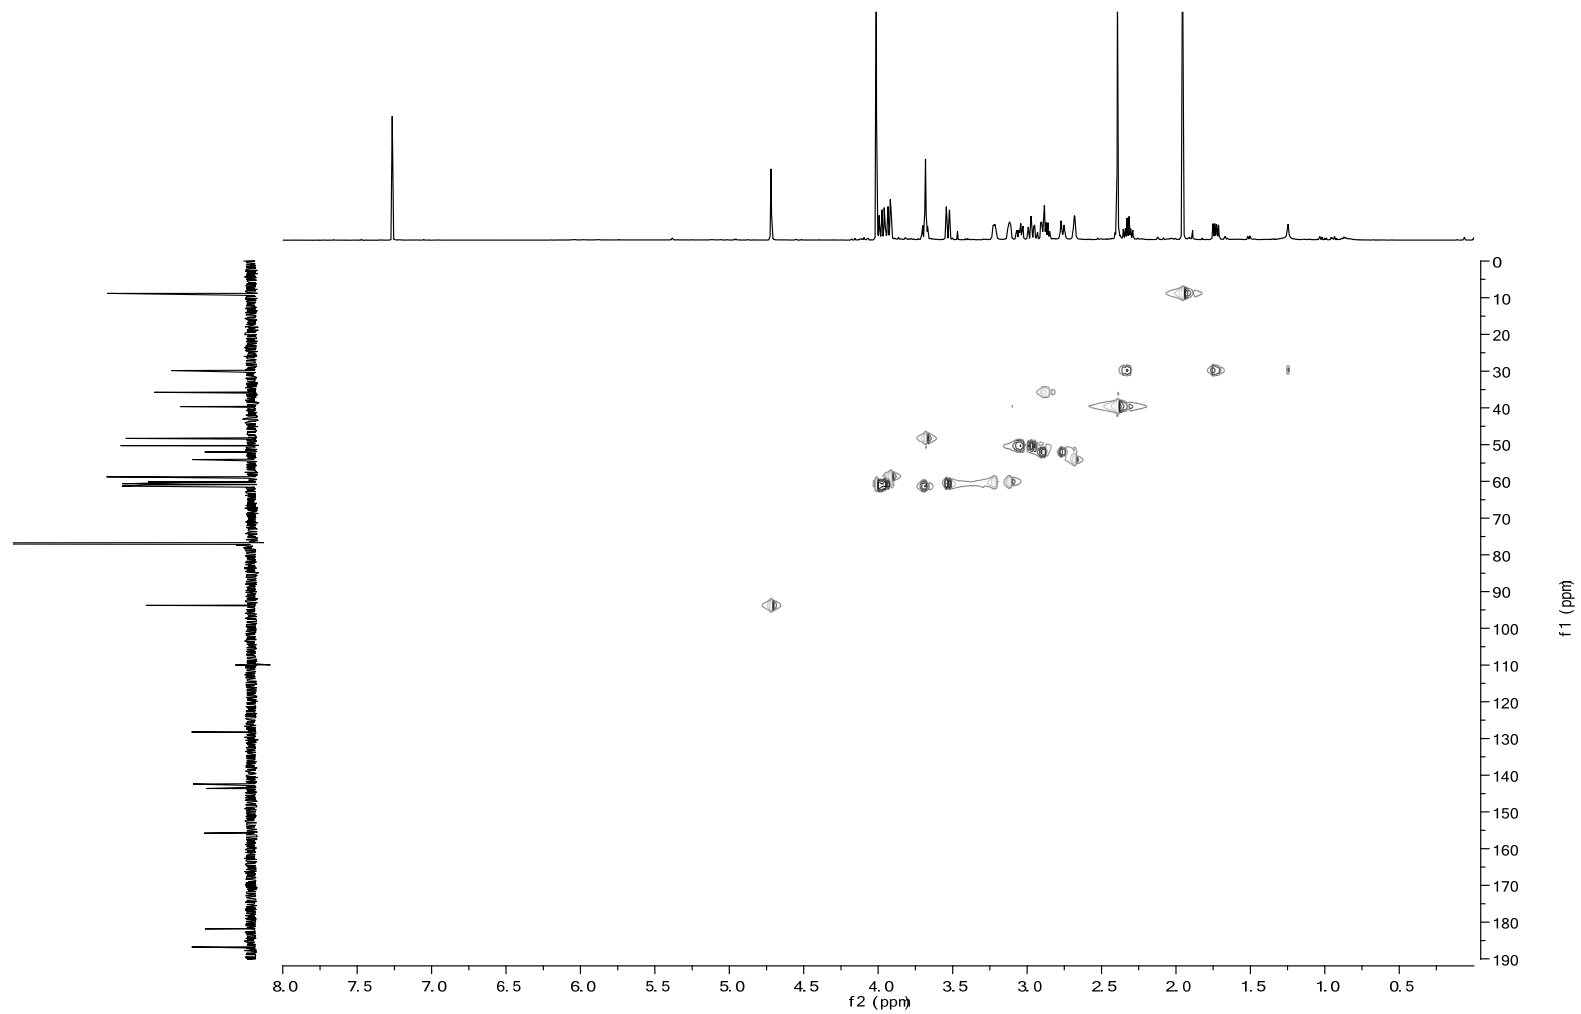

E

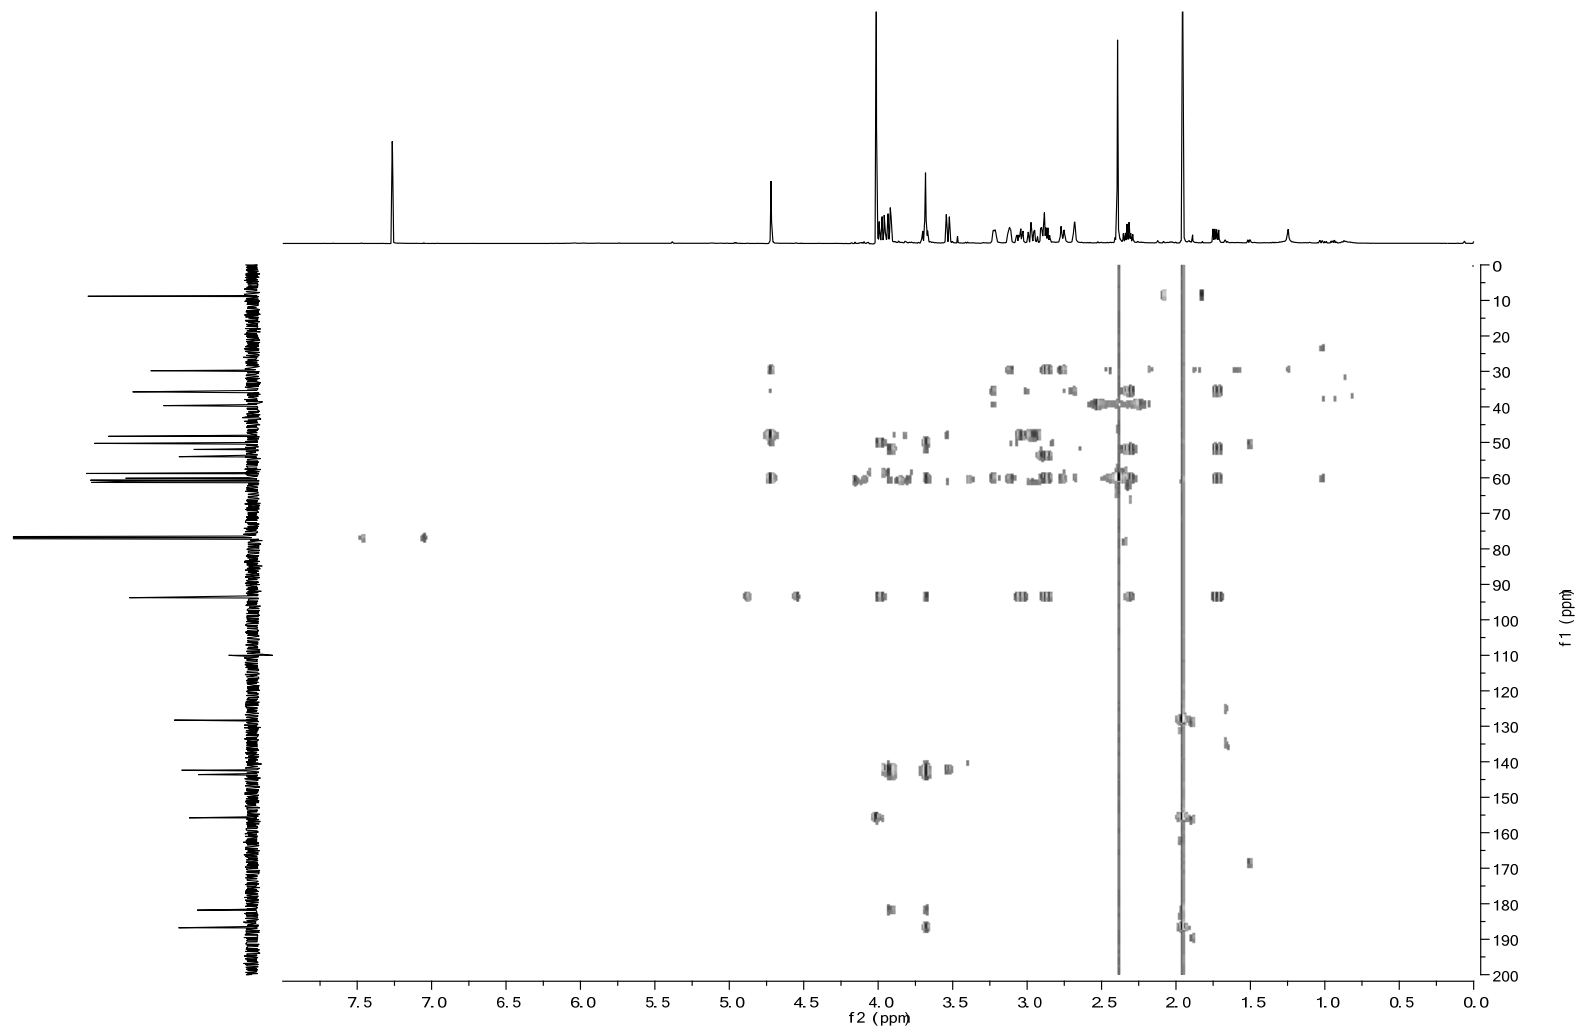

**Figure S3.** NMR spectra of compound **6**. (A)  $^1\text{H}$  spectrum (B)  $^{13}\text{C}$  spectrum (C) COSY spectrum (D) HMQC spectrum (E) HMBC spectrum.

**A**

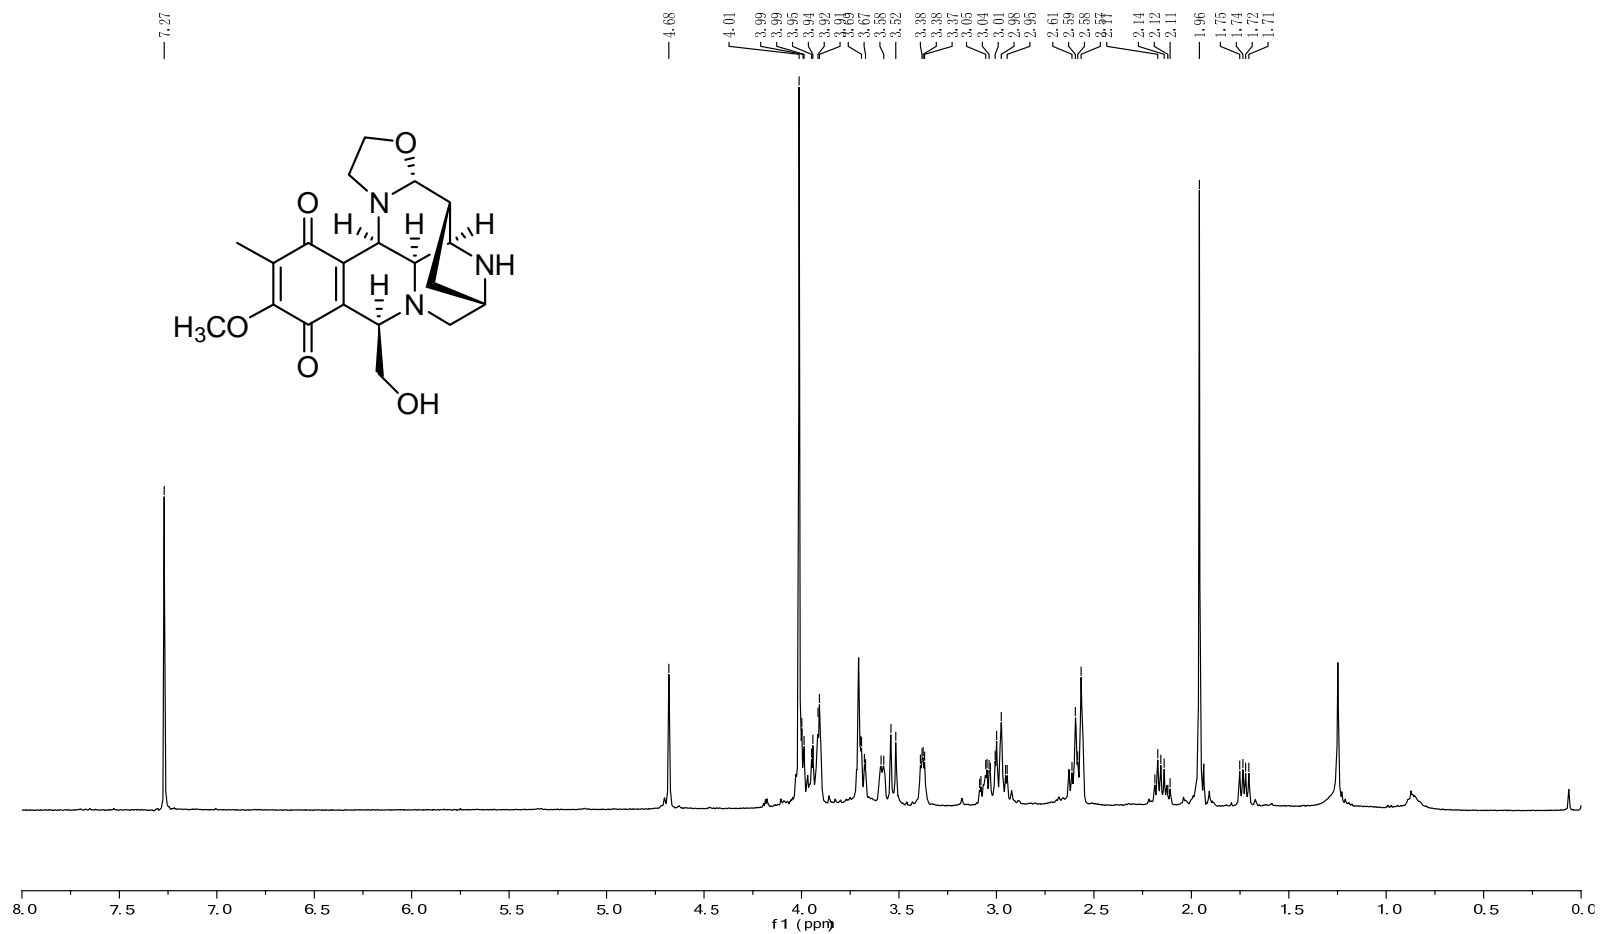

**B**

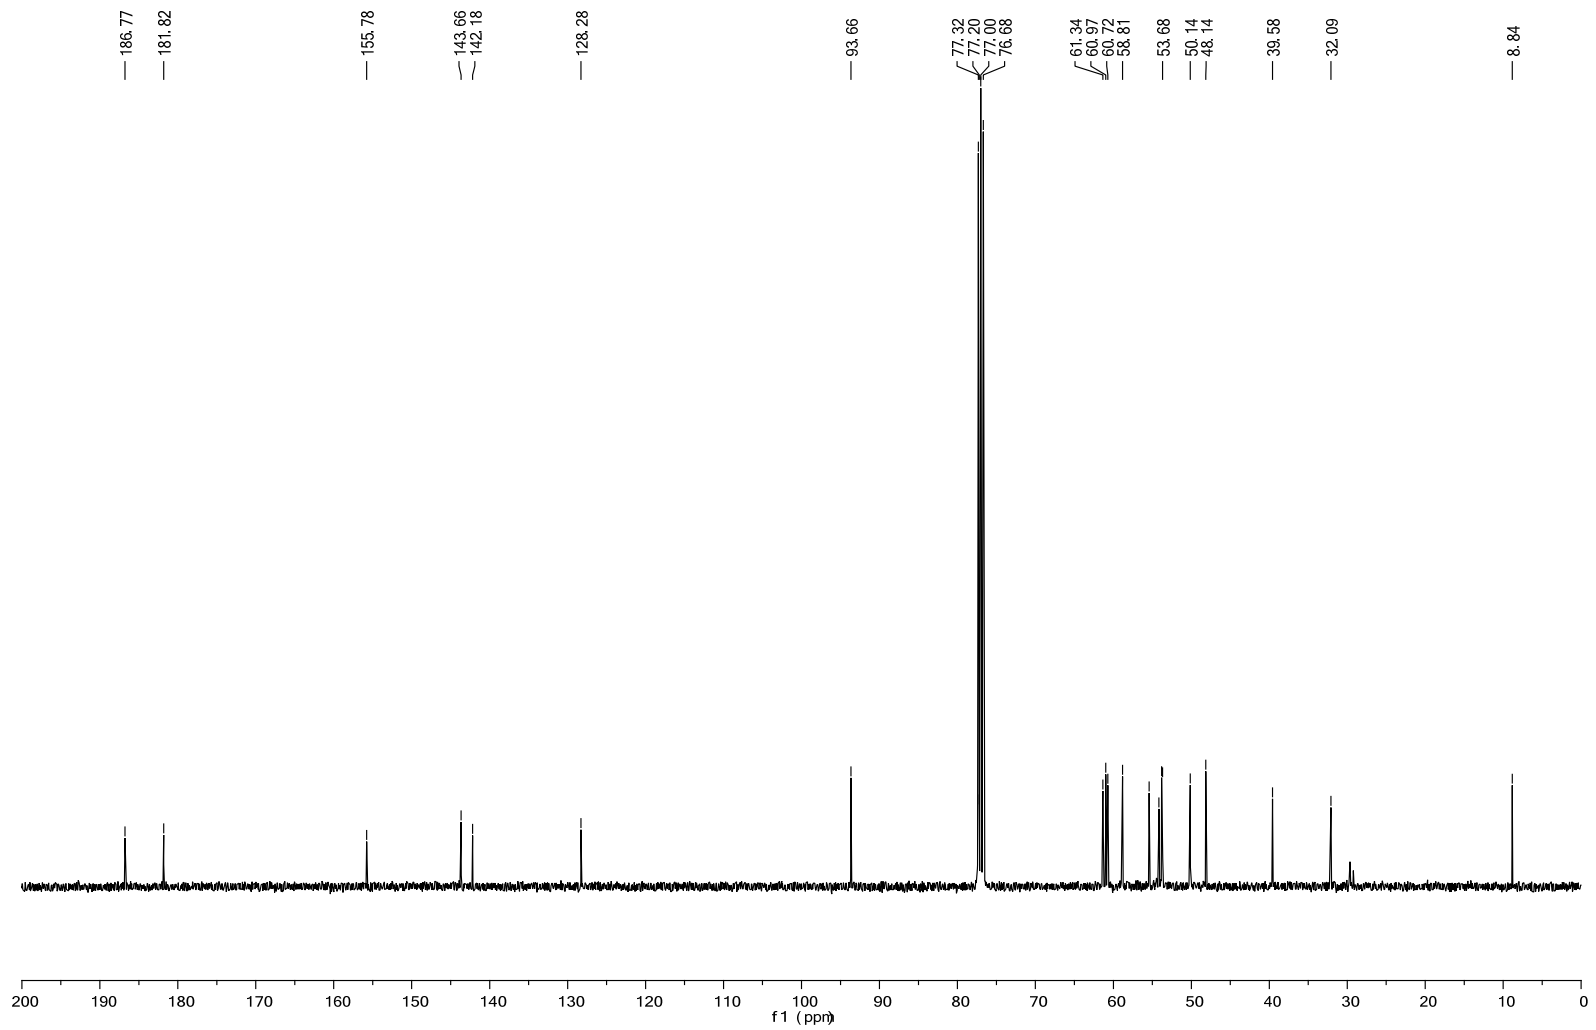

C

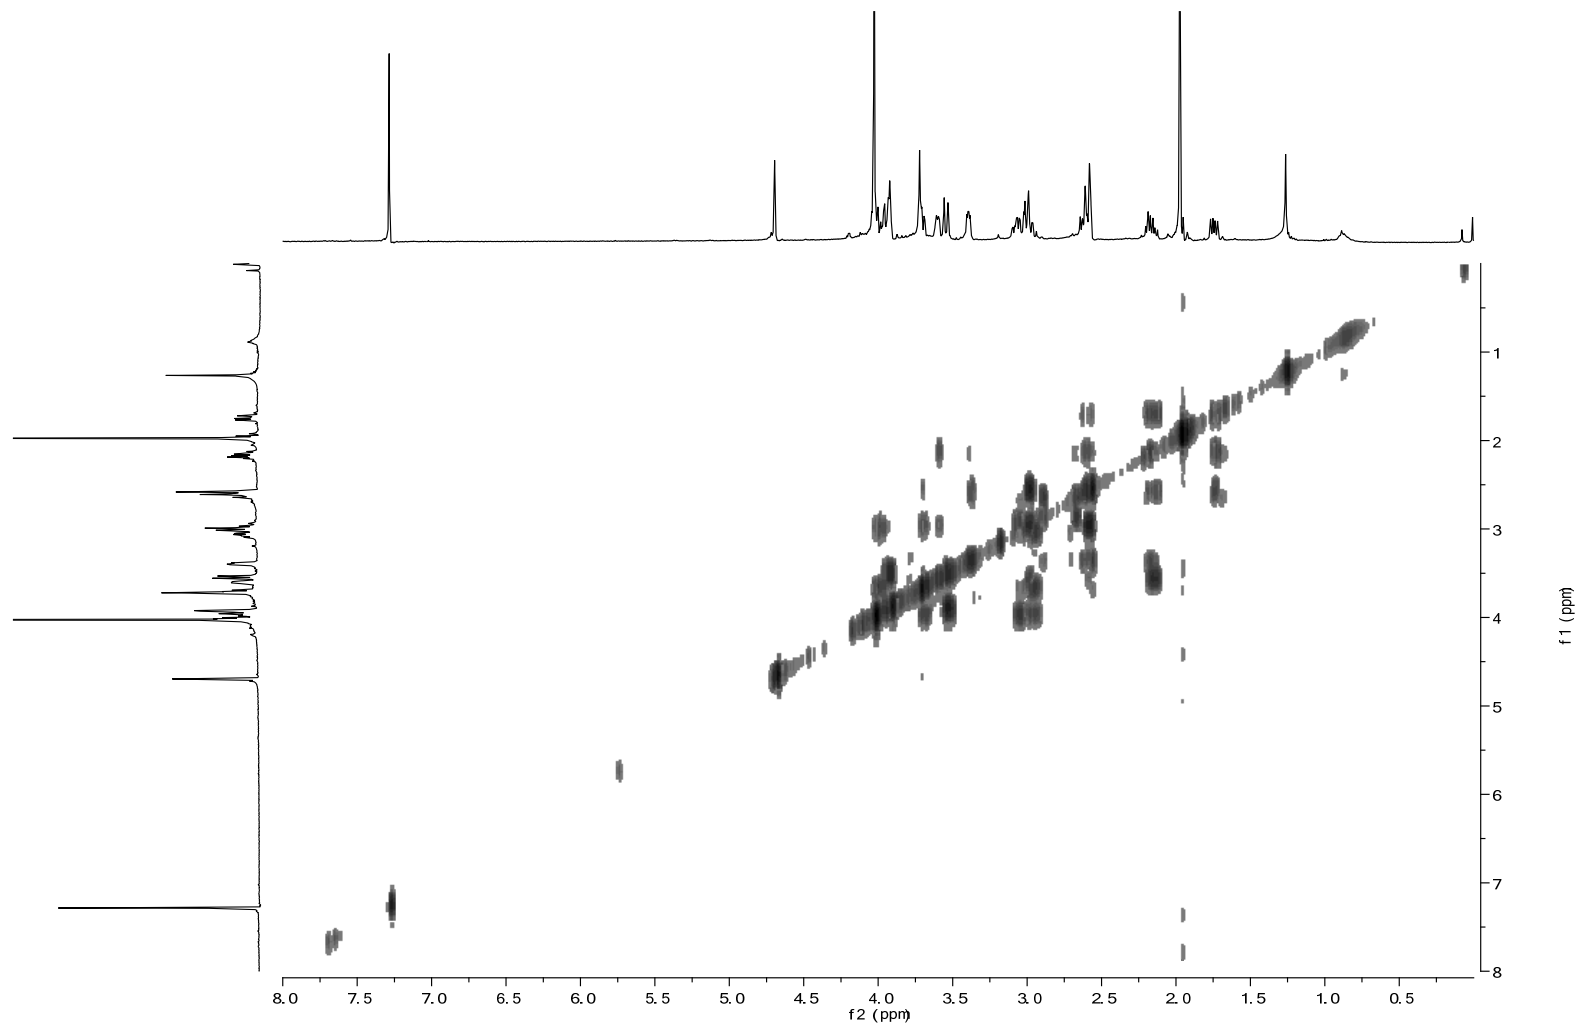

D

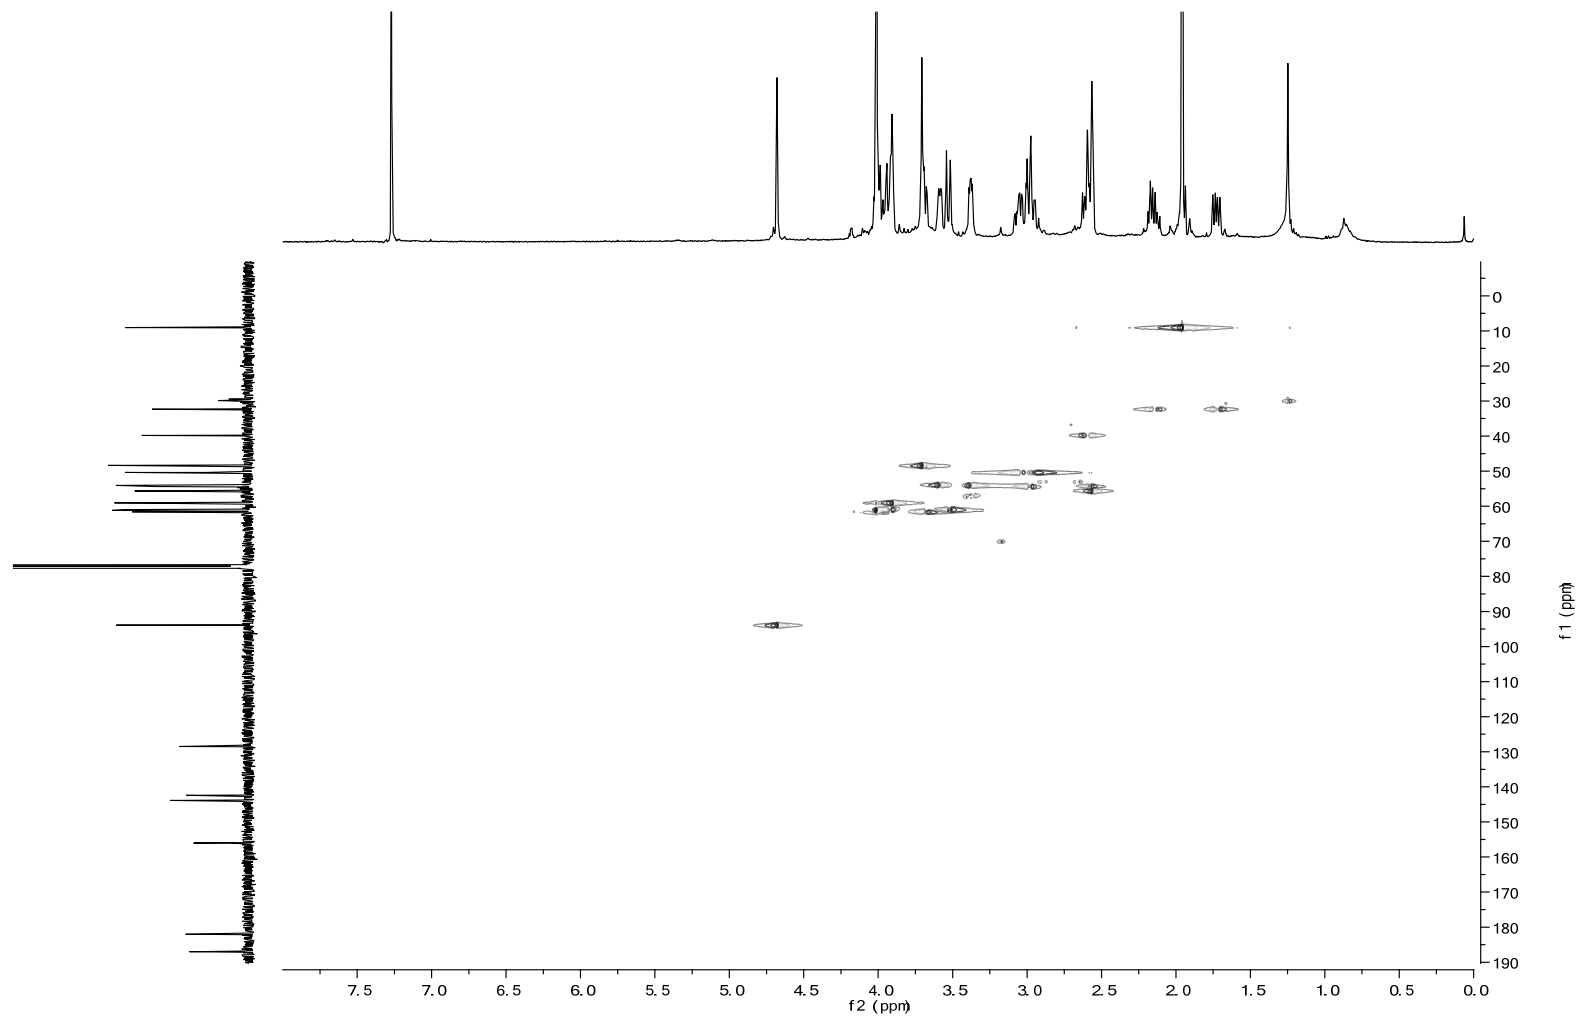

**E**

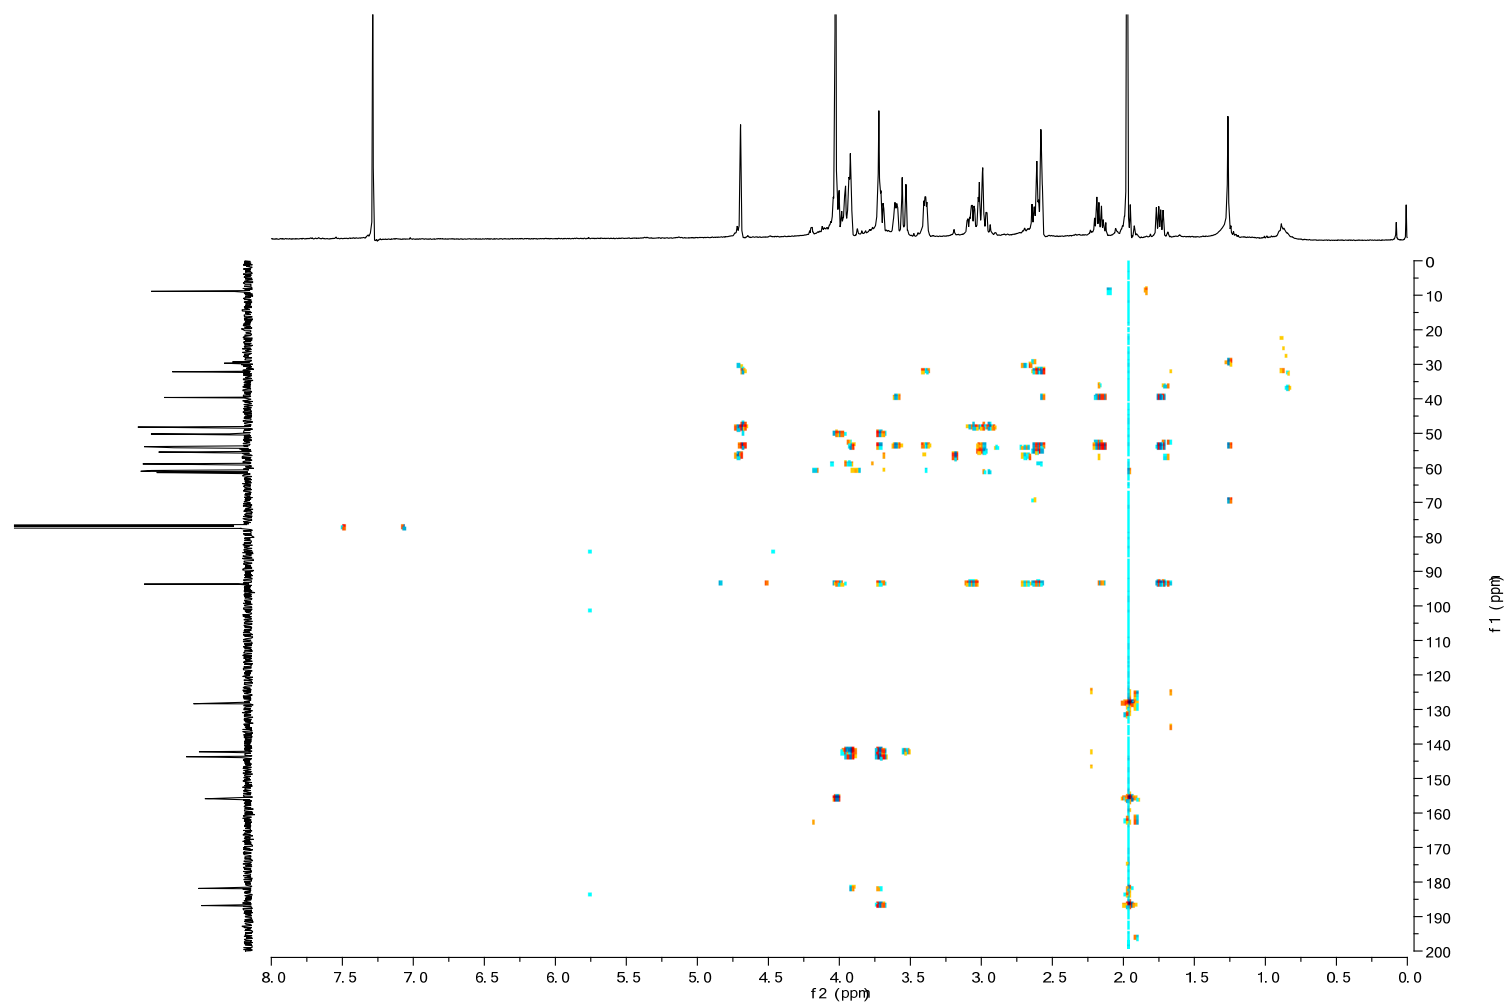



**Figure S4.** Antibacterial activity of NDM (1) and new analogues (5 and 7) using *E. coli* BL21 (DE3) as assay strain cultured in solid medium.

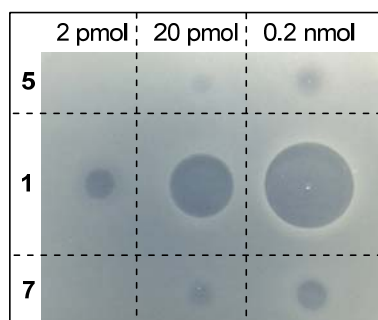

**Figure S5.** Bioinformatic analysis of NapU.

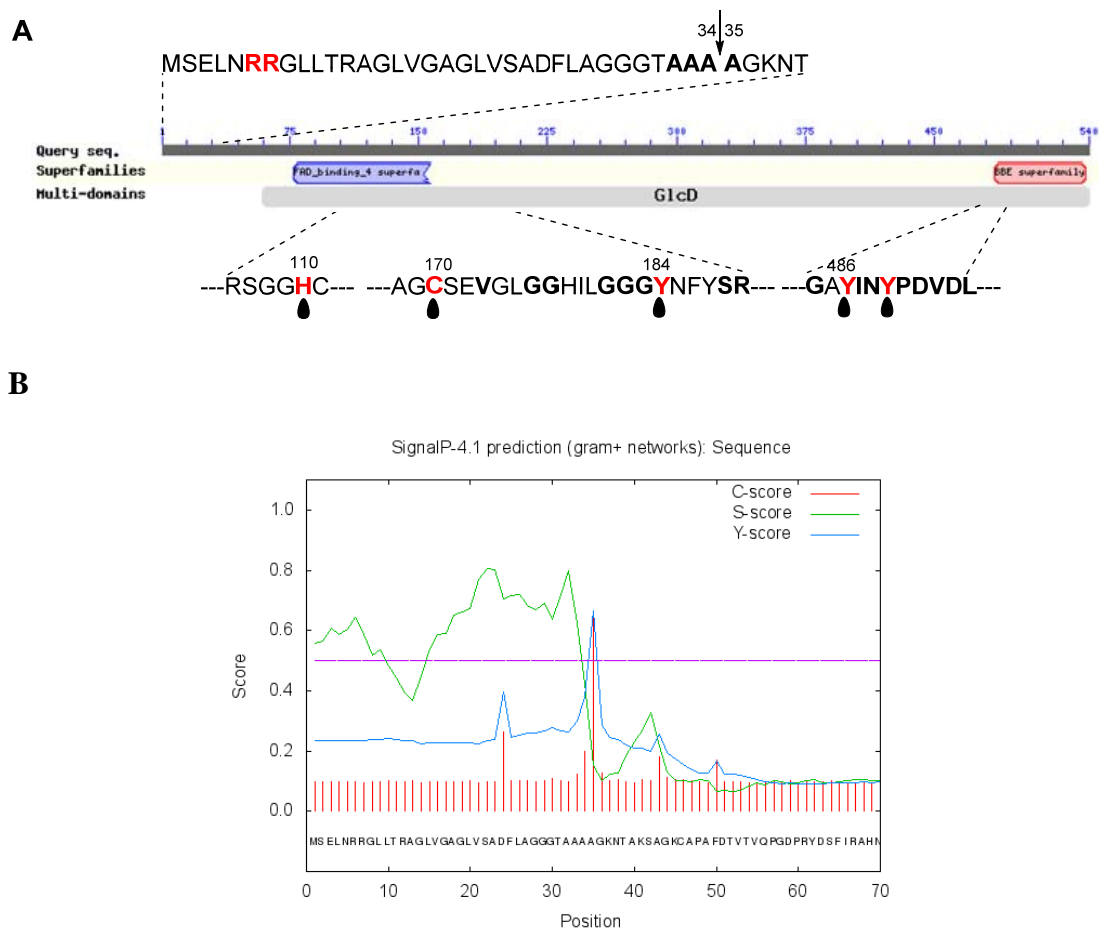

The arrow indicates the signal peptide cleavage site and the key amino acid residues for enzymatic activity are highlighted. Prediction of signal peptide cleavage site is between position 34 and 35.

**Figure S6.** UV-Vis absorption spectrum of recombinant NapU from *E. coli*.

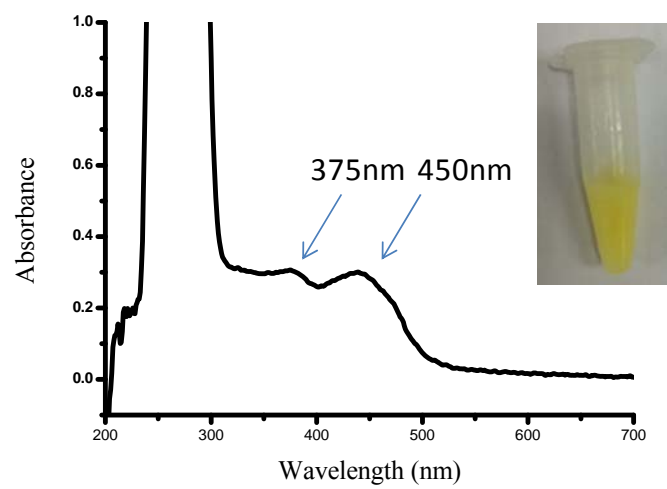

**Figure S7.** N-terminal sequence of NapU.

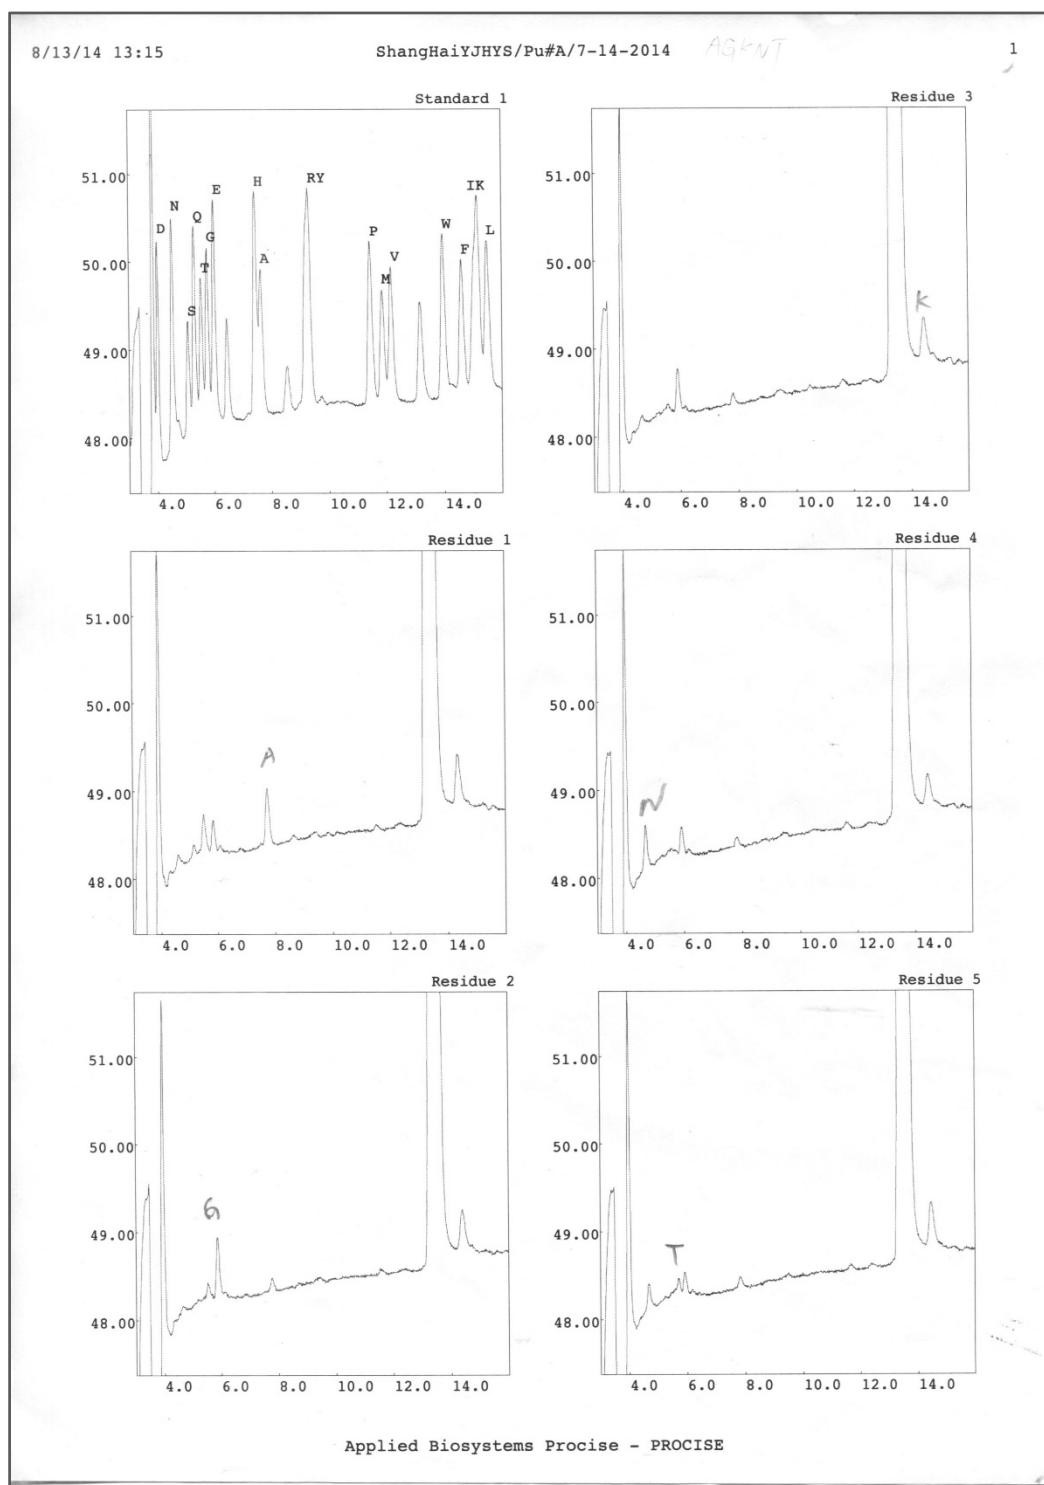

Purified 3 $\mu$ g of NapU was electrophoresis in 8% SDS-PAGE gels. The protein band was transferred from gels to polyvinylidene fluoride transfer membranes (PVDF, Millipore) in CAPS buffer (10 mM CAPS, 10 % ethanol, pH 11.0) subsequently. Then, the membrane with protein band was dried for sequence analysis after stained by Coomassie blue and washed several times in wash solution (40 % methanol, 1% acetic acid). The samples were sent to and N-terminal sequenced by Protein Sequencing Laboratory, School of Life Sciences, Peking University.

**Figure S8.** NMR spectra of compound **7**. (A)  $^1\text{H}$  spectrum (B)  $^{13}\text{C}$  spectrum (C) COSY spectrum (D) HMQC spectrum (E) HMBC spectrum.

**A**

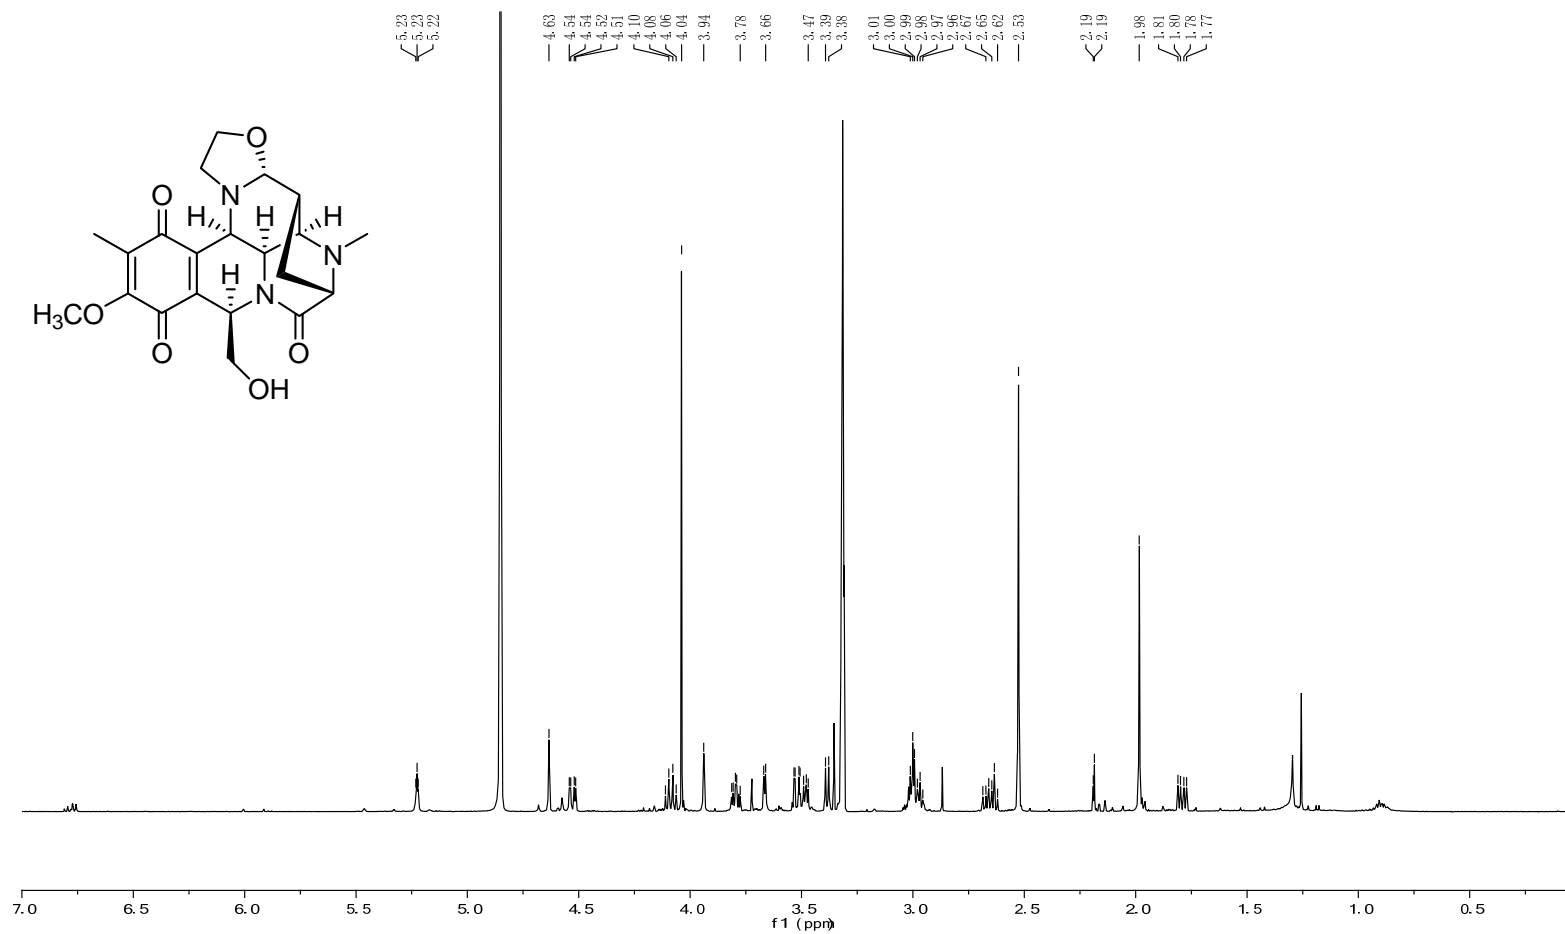

**B**

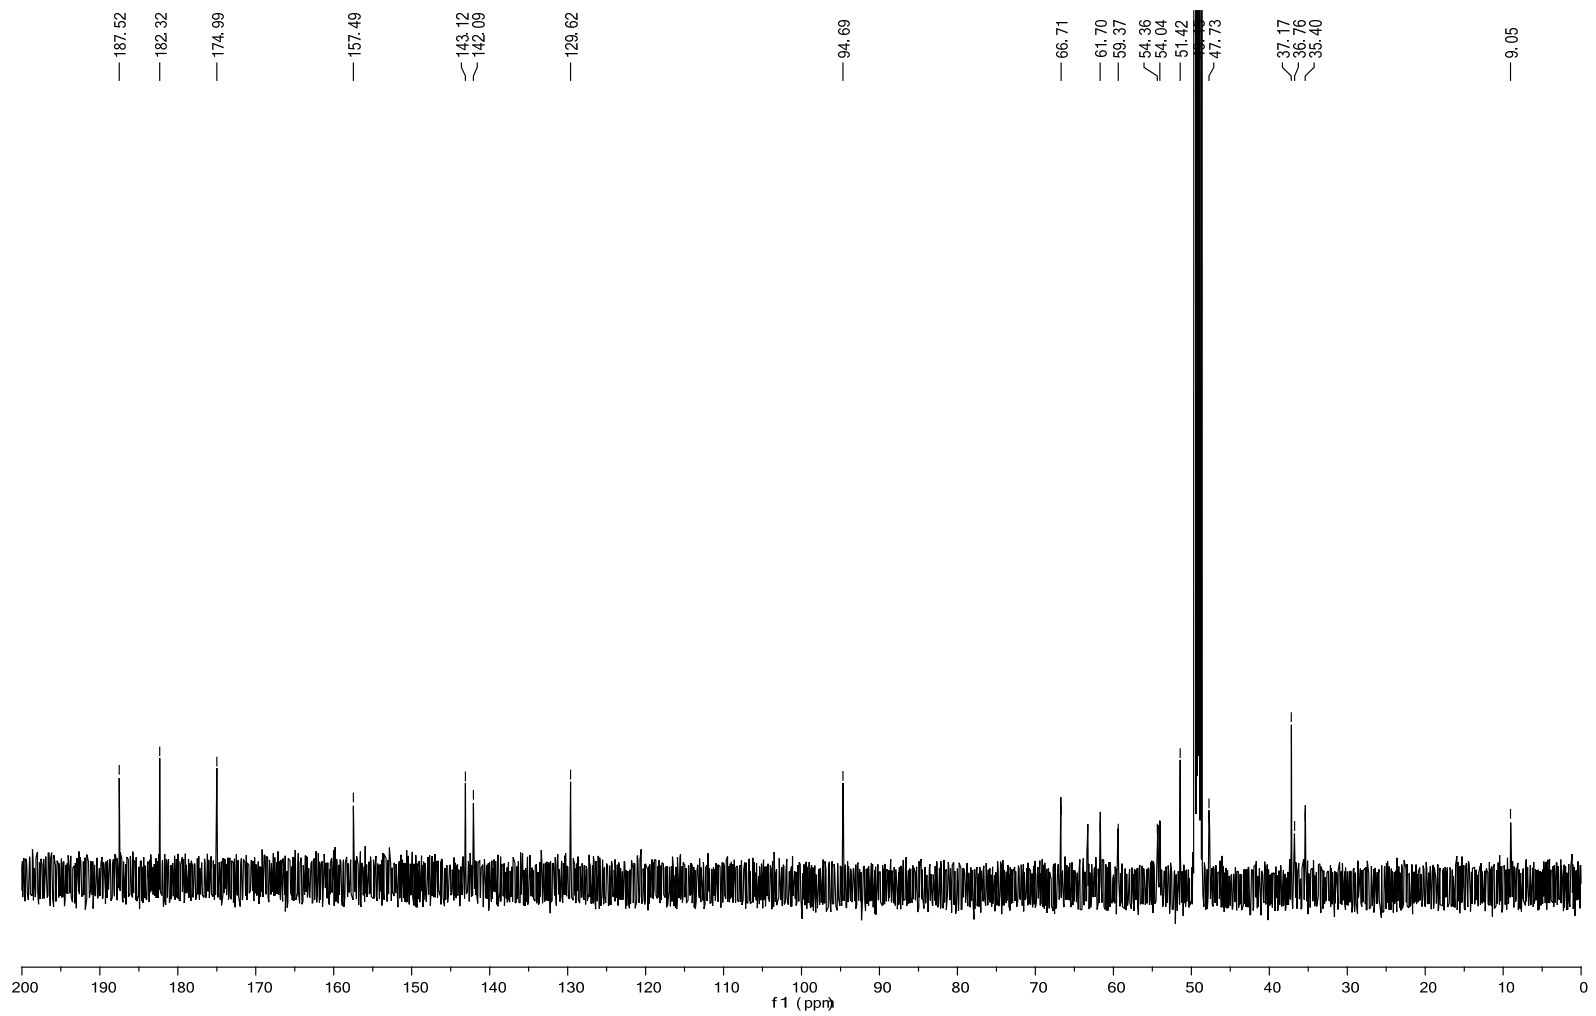

C

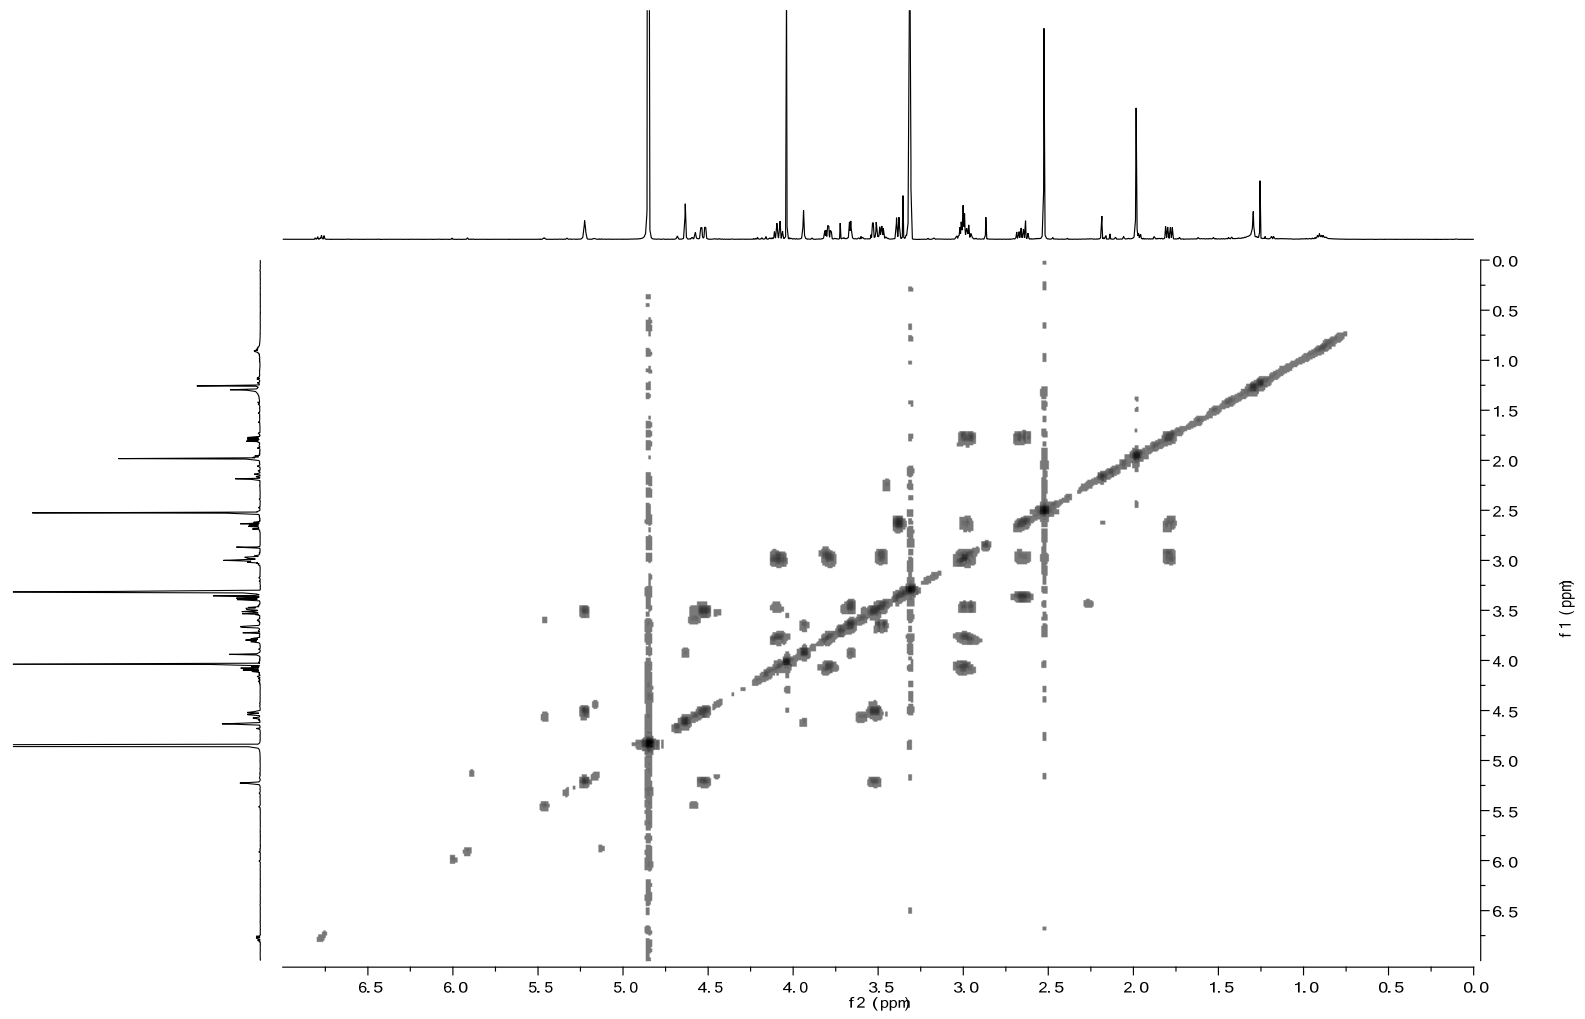

D

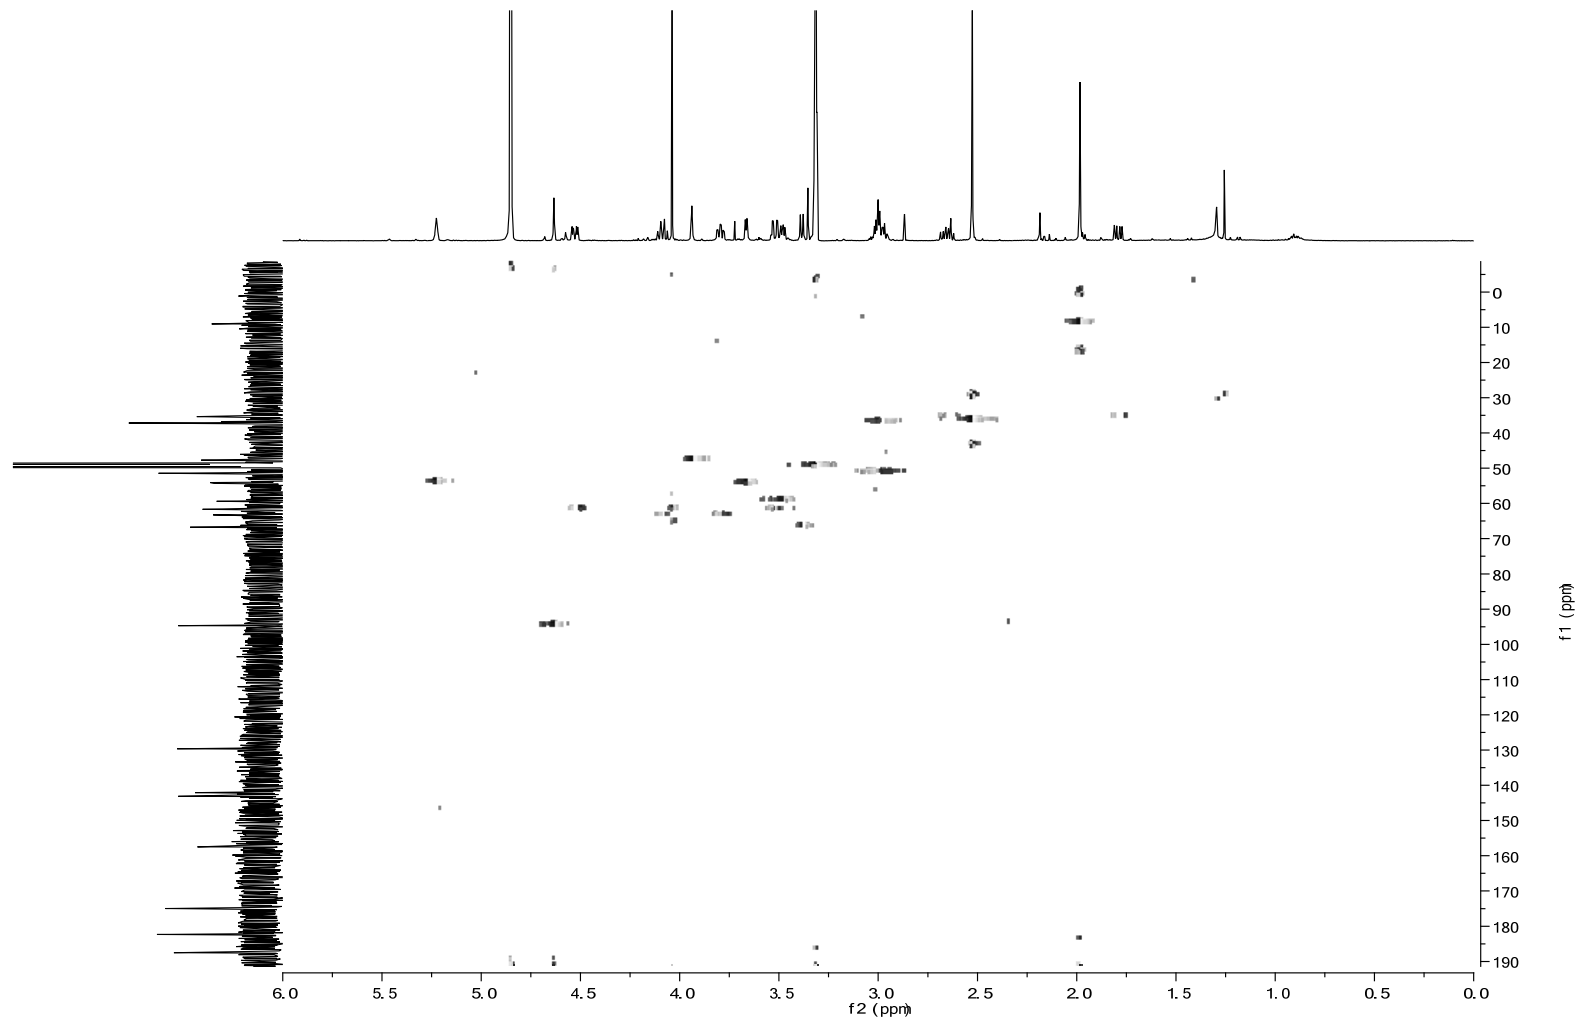

**E**

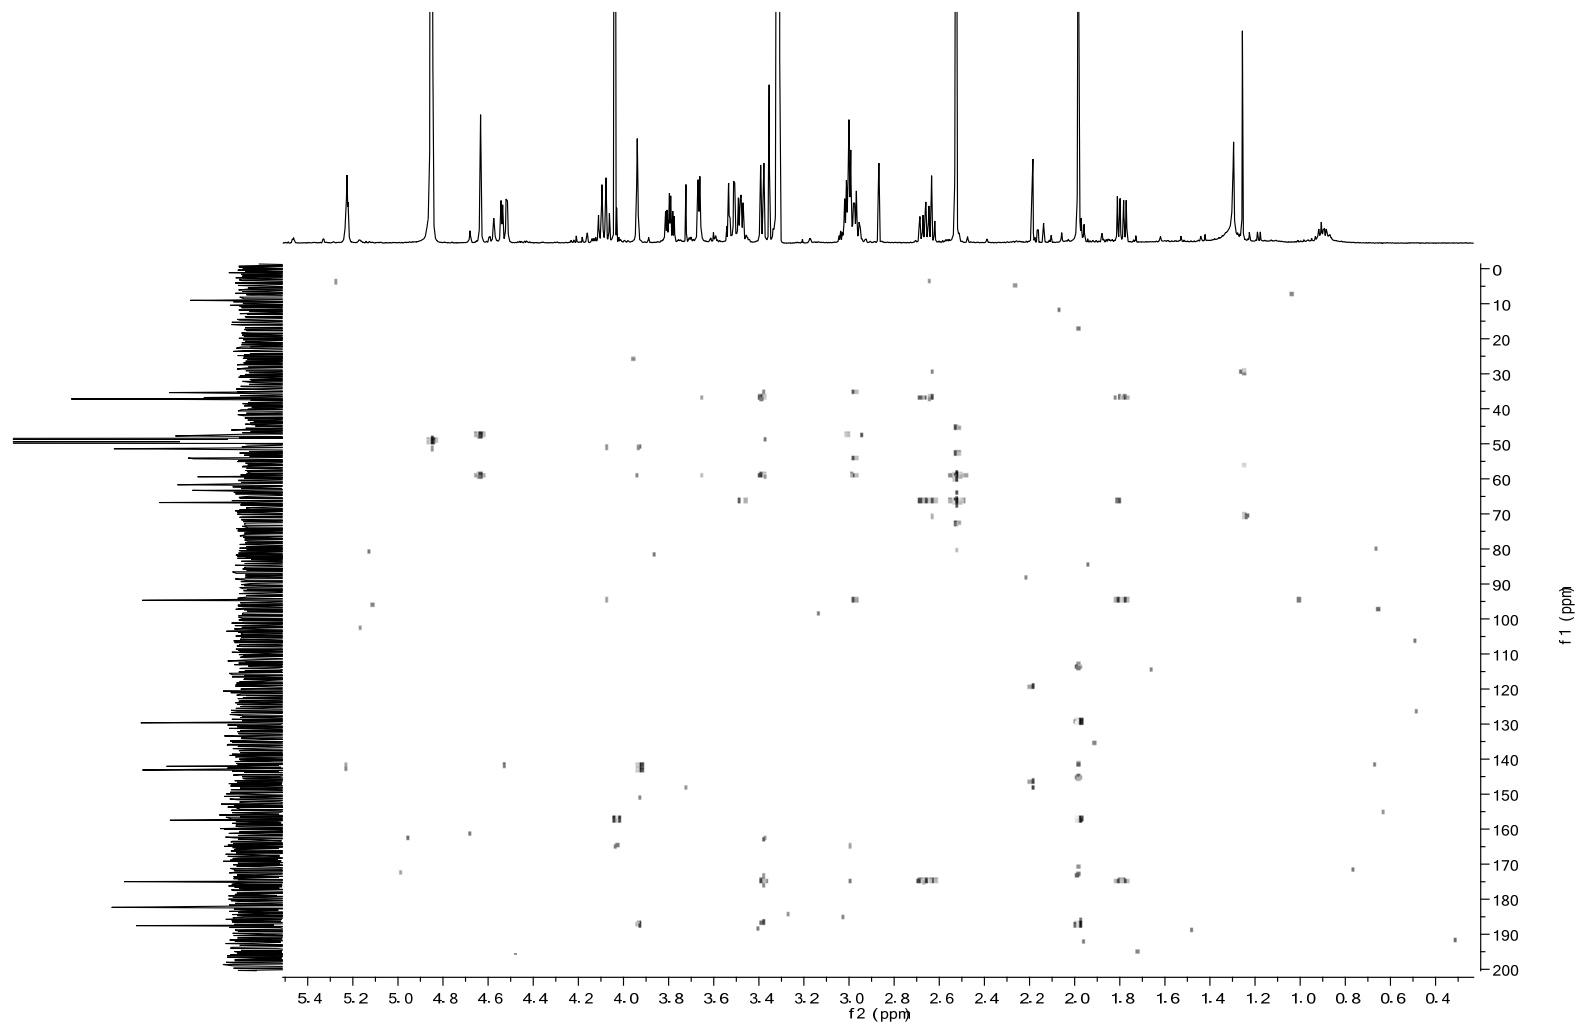



**Figure S9.** The kinetic investigations of NapU.

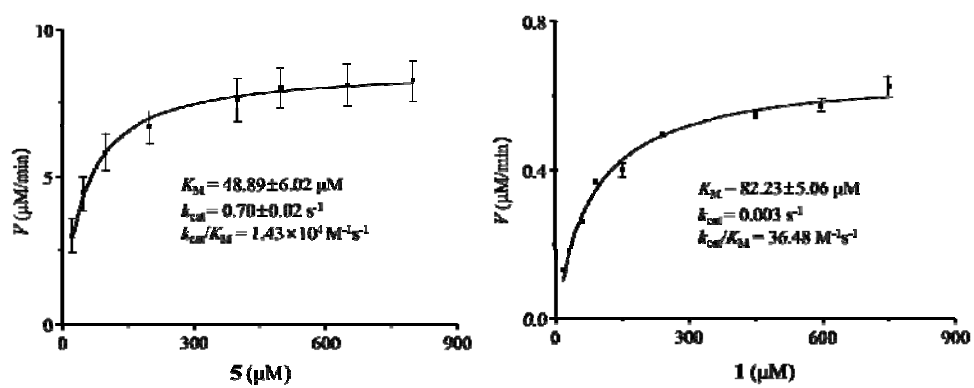

Figure S10. Proposed catalysis model of NapU.

A

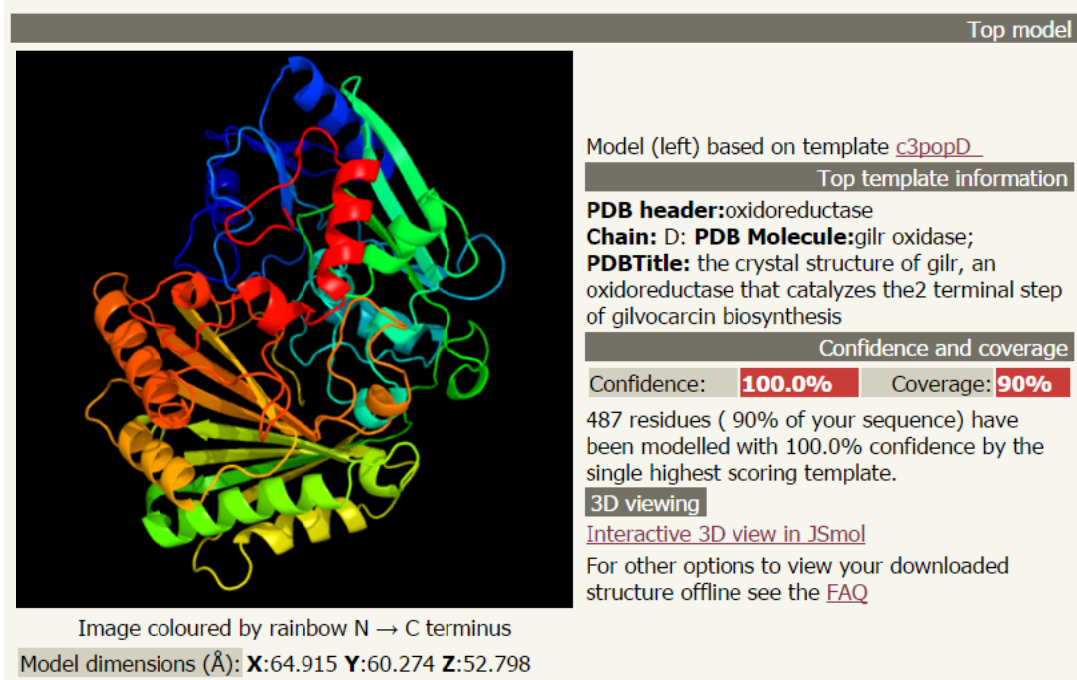

B

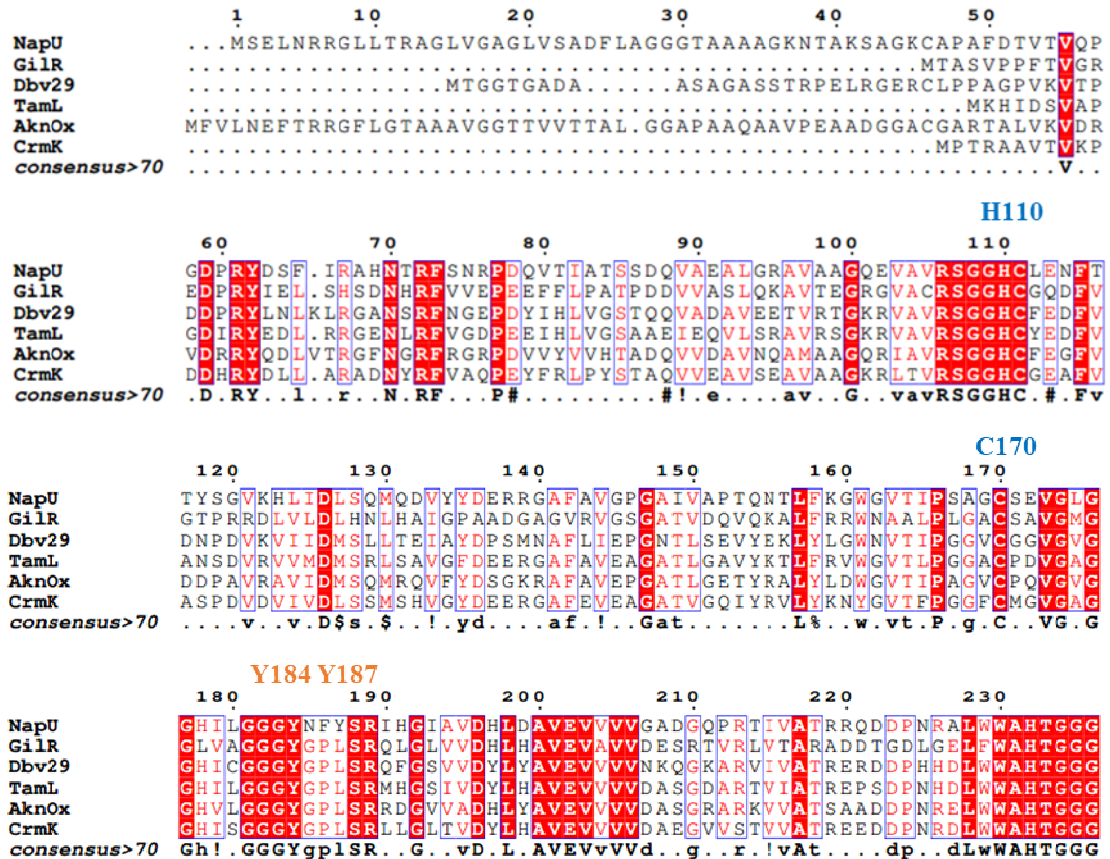

240 250 260 270 280 290

NapU GGNFGIVTRYWLRTPGV.NSSDPAKLPRGSNQR.VRNVQWSWNDLSPQAFFRTLVRNFRSR  
 GilR GGNFGVVTAYEFRSP EHLATEPV.GLPRRAAGRLHVQKVVFPWAMIDETSFVTVMRRFFFE  
 Dbv29 GGNFGVVTKYWMRVPED.VGRNPERLPRPPATLLTSTVTFDWAGMTBAAFSTRLLRNHGE  
 TamL GGNFGVVVRYWLRTEADVPPEPRGLPRPPAEVLLNTTVPWVEGLDEAAFFARLVNRNHGR  
 AknOx GGNFGIVTRYWLRTPGA.TGTDPSQLPRKAPTSTLRHIVTWDWSALTEAEFTRIIDNHGA  
 CrmK GGNFGVITRYWLRSPDA.VGDAPPEALPRPPASFHVARSWSWAELEADYVRLVSNFLD  
 consensus>70 GGNFG! !t.Yw.R.p.....dP...LP.....v...W..l.e.%.....n...

300 310 320 330 340 350

NapU WYELNSAPGAREVQVWASFSASHQAA...GVIGLMAGVSKDVPGGREALLDALFEATAAG  
 GilR WHERHSEPGSPSESSLFATFFVNHVSS...GVLQLMVQQDADVDPEGEILARFVASLTEG  
 Dbv29 WYERNSGPDSPYTGWLSQLMIGNEVPGMCESGFMPIQVDATRPDARRLLDAHIEAVIDGG  
 TamL WFEQNSGPDSPWCDLYSVLALTRSQS...GALAMTQLDATGPDAEKRLETYLAAVSEGG  
 AknOx WHQNSAAGTPYASMHVSFYLSNSRAA...GQILLDIQIDGGLDGAELLNDFVAAVNEEG  
 CrmK WQLRNCSTVDSPNIGLYALLECFHRSA...GHLAMHAQIPVDVDPDAEERM\$SWFLAELNBE  
 consensus>70 W.e.n\$...p...l...y...g...\$...q...\$...e.g

360 370 380 390 400

NapU AGVSPVADSRSELPWLDNRDNWYWG.....PPGRQKDKTADLKKSYTDEQLDITYAYLT  
 GilR TGVVGIPR.GGVMSWLTGTRYMSQADCGD.VMGARSAKSAAYHRAAPTDEQLSVLHRRLH  
 Dbv29 VPPAEVPE.PIEQRWLASTP.....GRGGRGPASKTKAGYLRKRLTDRQIQAVYENMT  
 TamL VGVQPHSD.TRRLPWLHSTRWPGIA..GDGDMTGRAKIKAAAYARRSFDDROIIGTLYTRLT  
 AknOx TGVPEPAVQ.RSTEPWLRATLANKFD...TGGFDRTKSKGAYLRKPWTAAQAATLYRHL\$  
 CrmK VAVAPSLT.RRRLPWLATSQLLAIPDVGPAGIAGRKVK\$ADLRGPHTREQLAAAYRHLS  
 consensus>70 ..v.....WL.....r.k.K.a...r...t...Q...y...\$.

Y442

410 420 430 440 450 460

NapU DDHGD.PGAQVNLAA LGGRINSVRSDA TAYVHRDSILRVYFTPGVWRAEAQDAKYVAWVR  
 GilR ADHPG.QASYVMFNSYGGENRRGPSDA AVPRDSVVKSSWFS.AWQDAELDELHLGWLR  
 Dbv29 HMDGI.DYGAVWLVIGYGGKVNTPDPAATALPQRDA I LKVNYYIT.GWANPGENAKHLTWVR  
 TamL STDYDNPAGVVALIA YGGKVNAPADRTAVAQRDSILKIVYVT.TWEDPAQDPVHVVRWIR  
 AknOx ADSQ..VWGEVSLYSYGGKVNVPETATATAQRDS I I KVVMSA.TWMDPAHDANLAWIR  
 CrmK RADYHCPSAAMEYIA YGGRVNTVDPAA TAVP.RGASLKTFTYMV.AWTDPDDEEHLRWIR  
 consensus>70 .....v...yGG!N.v...tA...Rd.i.k.....W.d...#.....WIR

Y486 Y489

470 480 490 500 510 520

NapU KLYRDVYRN TGGVPAPDAANS GAYINYPD VDLADPEWNTSDTPWHGLYYGANYARLQRVK  
 GilR GLYEFFAG TGGVPVTTGGRTDGCYINYPDADLLDPARNRSGEPWHHLYYKDNYARLRSK  
 Dbv29 KLYADVYAE TGGVPVNDVSDGAYINYPDSDLADPGINTSGVPWHDLYYKGNHPRLRKVK  
 TamL ELYRDVYAD TGGVPVGGAADGAYVNYPDVDLADDEEWNTSGVPWSELYYKDAPRLQAVK  
 AknOx EIYREIFAT TGGVPVDDRTGTFINYPD VDLVDERWNTSGVPWYTYLYYKGNYPRLQKVK  
 CrmK EIYRDIHSA TGGVPVDEVNTGAYINYPD VDLADPEWNTSGVPWHTIYYKGNYPRLQEI  
 consensus>70 ..Y.#vy...TGGVP.p.....G.%!NYPD.DL.D...NtSg.PW..lYY..ny.RL..vK

530 540

NapU SAYDPRDVFHHAISIRPA..  
 GilR RAWDP LNTFHHMSIGL...  
 Dbv29 AAYDPRNHFFHHAISIRP...  
 TamL ARWDP RNVFRHHAISVRVPPA  
 AknOx ARWDP RDVFRHHAISVRPPG.  
 CrmK SRWDP RNVFRHHAISIRP...  
 consensus>70 ...DPr#.F.HaIS!r....

C

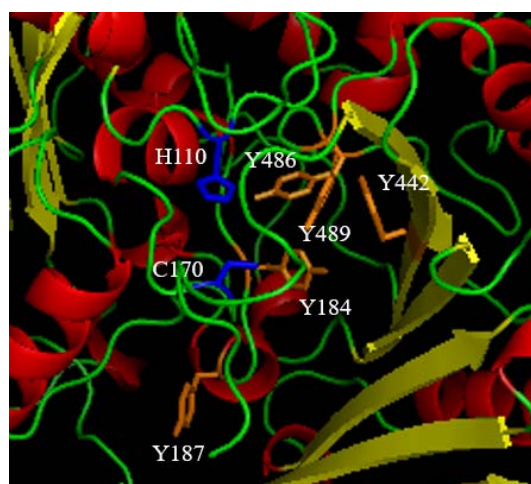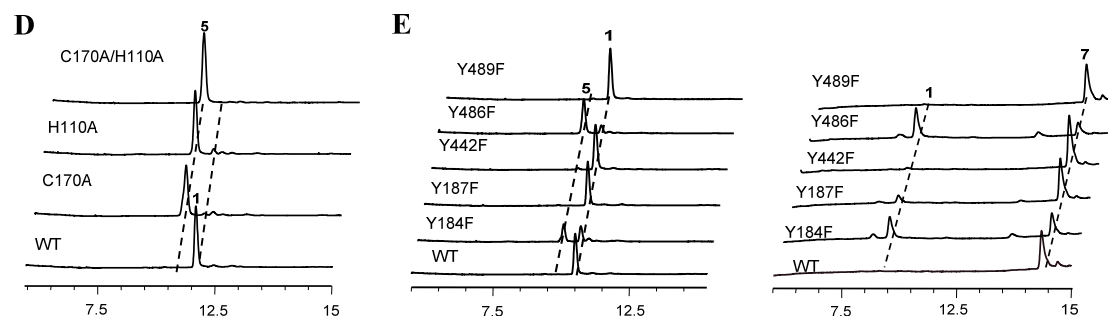

(A) Modeling analysis of the NapU by Phyre2 showed NapU is close to GilR. (B) Multiple sequence alignment of NapU and other homologous enzymes by Clustal Omega and colored byESPrpt3.0. H110 and C170 are conserved for FAD covalently binding. Y184 and Y489 are conserved for activating hydroxyl group. Other tyrosine residues are close to these conserved residues in catalyzed cavity of model and may be involved in catalysis. (C) The possible key residues are indicated in the model. H110 and C170 are shown in blue. The mentioned Tyrs are shown in orange. (D-E) Comparison of activities performed by NapU mutants and wild type.
